# Supplementary material for: Liver transcriptomics reveals features of the host response in a mouse model of dengue virus infection
Source: Front Immunol. 2022 Aug 26;13:892469. doi: 10.3389/fimmu.2022.892469 (PMC9459046; doi:10.3389/fimmu.2022.892469)
Supplement: Supplementary file 11 [file Table_11.xlsx]

## Sheet: Sheet1
node_name	MCC	DMNC	MNC	Degree	EPC	BottleNeck	EcCentricity	Closeness	Radiality	Betweenness	Stress	ClusteringCoefficient
Il6	92200000000000	0.61783	225	450	205.857	56	0.14199	680.136	9.67813	165213	59900000	0.06098
Jun	17400000000000	0.65227	153	308	195.53	83	0.14199	632.91	9.56625	116821	48200000	0.07141
Itgam	92200000000000	0.92099	152	304	202.209	12	0.14199	613.552	9.46504	36719.9	18600000	0.10235
Il10	92200000000000	0.85652	152	304	200.2	3	0.14199	617.302	9.48558	39486.1	19400000	0.09519
Itgb2	92200000000000	0.98183	125	250	197.489	1	0.14199	581.076	9.33718	29941.6	13900000	0.11579
Mmp9	10400000000000	0.87076	120	242	194.414	6	0.14199	599.069	9.44753	40494	19500000	0.10226
Egf	1580000000000	0.73708	115	238	188.488	23	0.14199	601.76	9.4696	73452.7	28300000	0.08332
Myc	292000000000	0.64973	106	218	179.043	40	0.14199	601.693	9.49015	87693.2	31700000	0.07618
Syk	92200000000000	1.04854	102	204	192.634	8	0.14199	568.443	9.31663	17675.4	9029384	0.13156
Vcam1	92200000000000	1.16307	99	198	196.021	1	0.14199	576.036	9.36991	10945.5	7646504	0.14726
Icam1	92200000000000	1.22122	98	196	195.292	6	0.14199	576.619	9.37067	9595.08	6282760	0.1551
Csf1r	92200000000000	1.18331	98	196	195.475	1	0.14199	562.443	9.29456	12780.1	7285320	0.15029
Fcgr3	92200000000000	1.36743	95	192	194.052	7	0.14199	552.893	9.24662	12485.5	6646624	0.17168
Tyrobp	92200000000000	1.10072	95	190	188.612	4	0.14199	542.676	9.17812	15151.9	6782752	0.14113
Pecam1	4700000000000	1.05335	90	180	182.597	7	0.14199	570.976	9.35088	19510	12000000	0.13731
Cd14	92200000000000	1.29543	87	174	191.263	3	0.14199	555.302	9.2763	10024.2	6093032	0.17062
Cxcr4	92200000000000	1.19454	87	174	185.554	3	0.14199	570.51	9.36306	14744.7	9418328	0.15733
Fcer1g	92200000000000	1.2248	87	174	187.874	4	0.14199	547.343	9.22759	9110.92	5278504	0.16132
Kdr	1480000000000	0.88586	82	166	175.833	21	0.14199	570.81	9.36762	24570.4	11800000	0.11595
C1qa	92200000000000	1.20191	77	162	182.054	6	0.14199	541.069	9.20172	18413	9130608	0.14845
Tlr7	92200000000000	1.25196	80	160	181.783	8	0.14199	541.843	9.20933	8417.93	4188240	0.16918
Ccl3	92200000000000	1.33689	80	160	184.809	1	0.14199	547.536	9.24281	4442.96	3458360	0.18066
Cd80	92200000000000	1.30398	79	158	187.636	2	0.14199	548.552	9.24966	4946.49	3568736	0.17689
Ccl4	92200000000000	1.18392	79	158	184.418	1	0.14199	545.969	9.23368	8237.23	4332968	0.16061
Plek	6570000000000	1.10379	70	156	169.962	26	0.16565	551.717	9.27554	42893.6	15900000	0.12506
Nfkbia	9400000000000	1.02318	75	154	168.648	2	0.14199	556.602	9.30294	17868.3	8313424	0.13377
Cybb	89000000000000	1.26997	74	152	180.984	4	0.14199	551.519	9.27249	19084.9	10000000	0.16678
Hmox1	652000000000	0.86746	74	148	169.695	8	0.14199	565.369	9.35697	28573.7	12900000	0.12006
Spi1	4580000000000	1.14305	71	146	183.369	4	0.14199	546.343	9.24966	15292.2	6794032	0.15154
Sirt1	974000000	0.64279	71	146	146.26	18	0.14199	559.56	9.33338	47026.9	17300000	0.08521
Vav1	60500000000	0.95048	70	142	170.071	6	0.14199	538.076	9.20172	16066.3	7037168	0.13006
Itgb3	21700000000	0.89023	69	138	168.509	1	0.14199	537.219	9.19943	10285	5753720	0.12589
Cxcl2	17500000000000	1.18498	69	138	173.224	1	0.14199	532.636	9.17965	4190.5	2356464	0.16757
Sell	92200000000000	1.16504	66	138	171.707	3	0.14199	543.652	9.24205	16818.8	8719416	0.15297
Vwf	632000000000	0.9752	67	138	166.614	9	0.14199	545.976	9.25347	25621.7	13400000	0.13118
Ifnb1	10300000000000	1.1195	65	136	170.064	12	0.14199	536.719	9.20552	19966.8	9848016	0.14728
Edn1	1050000000000	0.84554	66	136	157.536	4	0.14199	551.252	9.28771	22151.4	9087104	0.11416
Mrc1	58700000000000	1.36675	66	136	177.524	5	0.14199	530.786	9.1728	14542.3	8619608	0.18453
Ctss	92200000000000	1.48954	67	134	172.948	1	0.14199	524.376	9.12561	3979.32	2378560	0.21255
Socs3	201000000000	0.85865	64	128	158.567	6	0.14199	540.386	9.23292	14077.4	5968312	0.12426
Agt	1240000000000	0.93609	63	126	158.157	4	0.14199	552.443	9.30826	14932.2	8606104	0.13613
Ncf4	11400000000000	1.16828	62	124	164.373	3	0.14199	518.56	9.1043	11479.7	5972064	0.17073
Cd28	71900000000000	1.23423	61	124	171.666	4	0.14199	539.202	9.22988	6893.49	3487408	0.17545
Il7r	69300000000000	1.15859	61	122	169.011	1	0.14199	530.352	9.17889	4961.58	2434416	0.17017
Foxo1	8053642	0.76657	60	120	140.957	13	0.14199	551.952	9.31283	17058.4	7467504	0.11317
Itgb2l	84600000	0.7927	59	118	152.751	2	0.14199	527.252	9.16443	8620.59	4014328	0.11763
Nos3	808000000000	0.94615	57	118	150.308	6	0.14199	548.502	9.29076	24964.9	14500000	0.13241
Thbs1	895000000000	1.11799	57	116	153.62	12	0.14199	536.652	9.22455	16645.7	7077256	0.16192
Foxo3	13800000	0.78318	55	114	126.685	11	0.14199	544.719	9.28239	22754.8	9390752	0.11054
Bcl2l1	4240000000	0.98548	57	114	148.007	2	0.14199	538.852	9.24205	9036.2	4601376	0.1478
Ncf2	14400000000000	1.33136	56	114	160.547	6	0.14199	523.41	9.1454	11361.2	6032864	0.19376
Igf1r	1837951	0.67979	55	112	138.137	2	0.14199	551.876	9.31816	17662.4	7093896	0.09942
Fcgr4	68900000000000	1.58312	56	112	168.522	3	0.14199	506.352	9.03201	3284.35	2024176	0.23874
Lgals3	188000000000	1.28065	51	110	160.851	12	0.14199	531.802	9.20781	14213.8	6996808	0.17081
Ppargc1a	231480	0.52799	55	110	106.219	27	0.14199	537.826	9.24434	32592.7	10700000	0.08007
Arg1	4970000000000	1.16598	55	110	158.377	1	0.14199	534.736	9.22683	23618.6	17600000	0.17681
C1qb	86700000000000	1.49571	54	110	157.725	1	0.14199	497.352	8.99091	3643.76	2107136	0.21985
Atf3	5349887	0.74271	53	108	126.663	4	0.14199	524.652	9.16138	13730.5	5253024	0.10973
Flt1	1480000000000	1.18022	54	108	156.413	1	0.14199	536.302	9.22988	6166.96	3218120	0.17999
Selp	467000000000	1.29598	54	108	161.766	2	0.14199	520.936	9.13398	3291.04	2042560	0.19765
Erbb3	229499	0.67518	50	106	134.023	15	0.14199	538.102	9.2451	16870.4	6314912	0.09416
Cd163	4320000000000	1.28505	52	106	158.128	4	0.14199	514.602	9.11115	8315.26	3943736	0.19084
Nlrp3	2970000000000	1.1955	52	106	158.12	13	0.14199	524.402	9.1629	14408.9	8090976	0.17754
Ctgf	732000000000	1.09386	52	106	149.102	3	0.14199	533.836	9.21694	10961	4272160	0.16244
Lyz2	56000000000000	1.53228	53	106	163.695	2	0.12424	515.094	9.10354	3656.81	1834448	0.23504
Slc11a1	92200000000000	1.28263	52	106	154.916	1	0.14199	506.986	9.05788	6436.58	2738976	0.19048
Junb	305278	0.68971	52	104	120.973	10	0.14199	523.219	9.15453	8903.48	3771064	0.10642
Csf2rb2	39200000000000	1.59239	52	104	160.658	1	0.14199	513.01	9.09213	5131.23	4053856	0.24571
Trem2	3010000000000	1.14341	50	104	147.595	4	0.12424	506.985	9.0594	12558.9	5535136	0.16505
Cd53	24900000000000	1.61332	51	102	154.843	1	0.14199	491.776	8.95514	1987.47	1130592	0.25044
Clec4n	92200000000000	1.5683	51	102	157.273	1	0.12424	498.477	9.00233	1406.66	929696	0.24345
Mapk13	42329	0.45782	49	100	124.03	7	0.16565	528.9	9.2002	20930.9	8820000	0.06909
Fgr	1200000000	0.95939	48	98	147.2	8	0.14199	522.643	9.16214	6057.11	3155456	0.14559
Nfkb2	9600000000	0.9886	47	98	140.216	8	0.14199	518.569	9.13094	6984.29	3429408	0.14475
Sdc1	44400000000	1.13253	45	98	151.836	8	0.14199	520.393	9.15225	21186.2	10100000	0.15401
Brca1	443430	0.55389	45	98	105.085	4	0.14199	527.843	9.21161	32116.2	11300000	0.07532
Inpp5d	318000000000	1.02022	47	98	138.904	8	0.14199	502.01	9.04418	14427.8	12900000	0.14938
Itga2	643000000000	1.36699	48	96	149.163	4	0.14199	512.536	9.10202	2729.9	1577096	0.21623
Egr1	10300000	0.93599	46	96	127.714	5	0.14199	526.586	9.19182	9021.56	3580496	0.13772
Tgfbr2	81400000	0.61834	48	96	119.64	12	0.14199	538.319	9.25803	18733.4	6844520	0.09781
Gata3	12400000	0.7653	48	96	134.965	7	0.14199	527.302	9.19182	12294.8	5068032	0.12105
Igsf6	92200000000000	1.73293	47	96	153.244	3	0.14199	487.602	8.9384	2021.98	849000	0.26447
C1qc	77900000000000	1.53614	48	96	147.393	1	0.14199	488.402	8.95134	2119.96	1425680	0.24298
Tfrc	13500000000	0.94248	41	94	126.895	10	0.14199	524.536	9.18269	18766.6	6508888	0.11897
Sele	3080000000000	1.43405	47	94	153.485	2	0.14199	519.602	9.14616	3226.67	1710896	0.22832
Hp	428234	0.80468	47	94	120.925	5	0.14199	507.402	9.07843	9849.55	6718552	0.12812
Cdkn1a	12700000	0.97076	42	92	111.626	6	0.14199	526.319	9.19791	21618	9883808	0.1333
Nt5e	19900000000	0.90337	44	92	129.114	9	0.14199	525.469	9.1865	20618.3	9727704	0.13473
Epas1	110000000	0.82928	45	92	126.32	5	0.14199	532.436	9.23292	17229.1	7230488	0.12805
Gnai1	2899	0.50749	41	92	91.366	7	0.14199	500.96	9.05408	17469	5826264	0.06689
Ms4a6d	92200000000000	1.77615	45	92	149.768	1	0.14199	479.193	8.88969	1927.14	920536	0.27425
Cfp	215000000000	1.05768	44	92	128.359	1	0.12424	488.294	8.95438	8367.35	3251992	0.15767
Ccr1	80200000000000	1.45434	45	90	149.376	1	0.14199	510.302	9.09289	1331.58	810944	0.23471
Rel	9690000000	1.08495	40	88	125.937	10	0.14199	516.769	9.13551	16968.5	6684504	0.15099
Flt4	1230000000	0.99859	42	88	132.935	4	0.14199	524.786	9.18954	11816.4	5114632	0.14995
Clec4d	477000000000	1.36297	41	88	143.825	2	0.14199	481.269	8.90567	4671.06	2518144	0.19645
Lilrb4	24900000000000	1.72637	44	88	150.205	1	0.14199	496.352	9.00461	786.44	550760	0.28056
Hpx	61680	0.63011	44	88	88.043	2	0.14199	491.719	8.99548	10531	4180736	0.1024
Mmp27	722000000000	1.45085	43	86	149.662	2	0.14199	521.402	9.16899	1753.26	1248136	0.23748
Gpr65	814000000000	1.53696	41	86	133.329	3	0.14199	482.643	8.91861	4605.38	2307656	0.23201
Plaur	488000000	0.85548	41	84	121.962	1	0.14199	506.769	9.08223	7403.16	3524584	0.1354
Ptpn22	59600000	0.8908	36	82	121.645	7	0.14199	503.976	9.05636	12633.4	5110704	0.11924
Lpxn	3790000000	0.99059	39	82	118.031	2	0.14199	487.976	8.96275	8667.76	2850744	0.15116
Ly6c2	17100000000000	1.82333	41	82	151.656	1	0.14199	496.569	9.02668	370.837	330664	0.30292
Ace	603000000000	1.25392	38	82	126.937	4	0.14199	523.402	9.1865	10818.2	4229824	0.18308
Bcl2a1b	1890000000000	1.37982	40	82	139.002	1	0.14199	486.002	8.94449	3527.36	1732328	0.21981
Cd33	125000000000	1.45604	38	80	141.698	3	0.14199	505.343	9.08147	6986.95	3067272	0.22342
Slc2a4	109297	0.76394	37	80	100.498	8	0.14199	529.786	9.22835	20556.8	7196640	0.11266
Pirb	72200000000000	1.70492	40	80	140.62	1	0.14199	492.202	8.9871	617.604	445768	0.28544
Elane	277000000	1.13031	40	80	132.21	5	0.14199	499.669	9.04875	3739.55	1785432	0.18924
Tgfb3	12500000000	0.93227	37	78	115.228	8	0.14199	518.302	9.16443	11313.8	4414264	0.14386
Cd38	21200000000000	1.6081	35	78	136.902	7	0.14199	508.452	9.09822	11031.6	4822736	0.22711
Laptm5	1000000000000	1.67052	38	78	136.795	3	0.14199	477.526	8.90187	4073.07	1991632	0.26973
Lox	600000000000	1.16029	39	78	125.668	2	0.14199	515.686	9.1416	4966.83	2627272	0.1958
Itga9	11300000	1.02706	38	78	122.378	5	0.14199	488.952	8.97873	5897.47	3297264	0.16583
Fermt3	393000000000	1.34467	38	78	132.529	1	0.14199	482.293	8.92927	3349.73	1442168	0.21712
Gzmb	399000000000	1.39709	39	78	141.126	1	0.14199	503.769	9.07158	1372.99	805208	0.23576
Ccl6	1600000000000	1.2708	39	78	134.825	1	0.14199	478.269	8.90491	1592.11	826632	0.21445
Ahsg	72778	0.79847	37	78	79.697	3	0.12424	499.677	9.0419	14881.4	6969184	0.12321
Fgfr1	8532	0.54552	35	74	101.46	6	0.14199	511.136	9.13398	8263.34	2838152	0.08515
Alox5ap	5950000000000	1.80734	35	74	137.692	3	0.14199	481.243	8.92927	3135.15	1132584	0.28212
Bmp2	18762	0.60816	33	74	91.975	5	0.14199	517.919	9.17432	16926.9	4897920	0.08589
Cyba	170000000	1.05359	36	74	127.863	2	0.14199	509.519	9.10583	8315.82	3708152	0.17253
Mertk	151000000	1.12194	33	74	123.396	4	0.14199	502.986	9.07919	10419.7	3820480	0.15994
C3	106639	0.87272	36	74	107.602	1	0.12424	489.644	8.98634	4557.33	2313768	0.14291
Hnf4a	25748	0.62854	36	72	82.593	11	0.14199	522.952	9.204	21238.3	10300000	0.10876
Csf2rb	26000000000	1.5103	36	72	144.422	5	0.14199	509.076	9.10963	4351.87	3918096	0.26135
Il4ra	1990000000	1.21638	36	72	134.887	1	0.14199	497.943	9.04951	1312.93	1002072	0.21049
AF251705	84100000000000	1.85477	35	72	133.157	1	0.12424	467.961	8.8387	913.73	401720	0.30595
Mmp7	87700000000	1.11626	34	72	121.137	4	0.14199	512.936	9.14083	6600.45	2556088	0.17606
Tlr8	146000000000	1.46105	35	70	137.081	3	0.14199	487.602	8.97493	843.677	556712	0.25507
Nedd9	37968	0.89792	31	70	104.74	3	0.14199	481.336	8.93611	7688.16	3504520	0.12754
Klf4	78591	0.82723	34	70	111.125	3	0.14199	521.443	9.19487	7467.33	3559320	0.13747
Fpr2	466678	0.84437	35	70	118.676	1	0.14199	486.352	8.96884	4690.35	2852744	0.14741
Vcan	29962	0.72883	31	70	94.746	12	0.14199	490.952	9.00156	13757.2	5626496	0.10352
Il1rn	6930000000	1.26874	33	68	121.134	1	0.12424	485.511	8.96656	3329.64	1526392	0.21247
Il6ra	216000000	1.17437	33	68	123.503	1	0.14199	497.036	9.03809	1182.37	531608	0.19666
Smad9	1157	0.53059	31	68	73.578	7	0.14199	490.702	9.01678	21928.3	11100000	0.07989
Msr1	102000000000	1.36542	34	68	126.054	4	0.14199	486.286	8.97036	3176.73	2082504	0.24056
Tnfaip3	60200000	1.19534	33	68	113.006	2	0.14199	494.202	9.02592	2103.87	1037592	0.20018
Pf4	16100000000	1.22091	34	68	124.562	1	0.14199	496.052	9.03429	2233.33	1039008	0.2151
Irs2	16021	0.66582	33	68	102.594	2	0.16565	512.733	9.14997	8206.89	3215568	0.1115
Map1lc3b	771611	0.92454	25	68	93.476	10	0.14199	508.419	9.11648	22940.3	7654464	0.09745
Slc15a3	12000000000000	1.87372	34	68	134.571	1	0.14199	472.436	8.87295	378.14	267416	0.33011
Havcr2	27000000000	1.41684	31	68	127.777	3	0.12424	488.794	8.98787	6392.04	2400424	0.21422
A2m	47514	0.83221	34	68	91.853	2	0.14199	492.186	9.01983	4309.33	2537232	0.14662
Cyp2c70	8864958	0.99087	33	66	37.249	1	0.12424	437.362	8.65681	4800.36	2767944	0.17622
Sgk1	8356	0.54857	29	66	80.879	16	0.14199	508.193	9.12561	21546.3	9759072	0.07832
Entpd1	40400000	0.87029	33	66	93.093	2	0.14199	491.436	9.02059	7296.77	3534432	0.15478
Cyp2b13	4446355	0.98884	32	66	23.917	1	0.12424	396.929	8.31359	3769.06	2275768	0.1669
Cblb	33577	0.92082	29	64	110.274	4	0.14199	489.936	9.00233	5864.01	2489944	0.13988
Relb	10100000000	1.3203	32	64	110.005	1	0.12424	499.944	9.06093	1458.97	1227064	0.2371
Kat5	1427	0.56781	27	64	48.687	18	0.16565	490.583	9.03505	26790.5	8714936	0.07639
Thbd	13400000000	1.38641	28	64	114.62	5	0.12424	491.761	9.00765	6050.95	2953840	0.19841
Adamts1	479000000	0.96122	32	64	82.205	1	0.14199	488.269	9.0008	4810.26	1936448	0.17262
Ctsg	2509034	0.90598	32	64	104.276	1	0.12424	487.194	8.98558	2401.09	1257968	0.1627
Cyp1a1	8837770	0.97955	31	62	43.152	6	0.12424	483.777	8.96808	16085.7	7517688	0.17768
Il1r1	1090000000	1.35271	31	62	113.586	1	0.12424	485.994	8.97417	680.228	390760	0.24537
Pdgfra	1631210	0.88163	29	62	101.247	6	0.14199	506.202	9.11115	8630.14	3687632	0.14278
Vav3	4848213	1.00487	30	62	109.314	3	0.14199	492.969	9.01831	2606.45	1257648	0.1724
C5ar1	118000000000	1.64424	31	62	132.174	2	0.14199	486.502	8.98102	609.31	540648	0.29825
Selplg	215000000	1.446	31	62	128.309	2	0.12424	492.068	9.01298	1499.74	1104840	0.2623
Tab1	11976	0.59731	27	62	81.547	6	0.14199	492.952	9.02287	11535.7	4838808	0.08673
Cyp2b10	4436960	1.00287	31	62	23.512	1	0.12424	417.886	8.52059	4260.84	2703096	0.18191
Cps1	24911	0.83345	26	62	39.984	5	0.12424	453.429	8.77706	20407.7	11500000	0.11211
Ms4a6c	498000000000	1.86122	29	62	113.955	4	0.14199	449.969	8.7352	7433.18	5766336	0.30143
Mmp8	175000000	1.16029	31	62	114.373	1	0.14199	499.569	9.07158	1574.96	1024752	0.21047
Tat	12167	0.67814	30	62	41.625	1	0.12424	446.569	8.73368	7805.98	2716872	0.11634
Tlr13	196000000	1.3871	30	60	119.046	3	0.12424	493.044	9.02059	919.8	633744	0.25424
Clec4e	116000000	1.30695	30	60	113.255	2	0.12424	474.327	8.89882	682.881	325608	0.23955
Apaf1	535062	0.6843	30	60	79.955	1	0.14199	493.219	9.0419	5999.35	2278752	0.12542
Chek1	16449	0.65558	25	60	55.426	9	0.14199	488.326	9.02135	16731.3	6138952	0.08814
Vdr	9053	0.65261	26	60	90.93	1	0.14199	514.536	9.15529	13266.5	6096928	0.09605
Mefv	1593513	0.94389	27	60	95.905	6	0.14199	485.119	8.97341	9793.13	3455912	0.14463
Siglec1	101000000	1.13434	30	60	123.084	1	0.12424	480.144	8.93992	587.648	293928	0.20791
Itga7	1671349	1.12992	28	58	103.49	3	0.14199	478.202	8.93383	1578.89	793576	0.19722
Bcl2l11	4081761	1.12299	28	58	97.056	1	0.14199	507.626	9.12409	3638.5	1926832	0.19601
Lepr	27532	0.91613	25	58	90.462	4	0.14199	497.436	9.0731	8821.55	2780080	0.13309
Map3k5	455693	0.80986	26	58	85.353	11	0.14199	511.46	9.14616	15665.7	5850544	0.12583
Sdc4	1195164	1.02501	27	58	102.695	1	0.14199	479.686	8.95514	2841.17	1215608	0.16818
Rgs1	6750000000	1.49365	22	58	104.445	2	0.14199	468.826	8.86305	4855.7	1941640	0.18028
Adrb2	381881	0.85264	28	58	81.81	6	0.14199	495.676	9.05484	12689.4	5506760	0.14882
Cd84	147000000000	1.70528	28	58	112.026	2	0.14199	458.093	8.79228	747.001	257776	0.29764
Gata2	12336	0.82882	24	56	85.478	5	0.14199	488.236	9.00765	9947.09	4245976	0.12078
Jund	172519	1.01026	27	56	87.742	2	0.14199	494.319	9.04342	2044.09	938168	0.17792
Agxt	26412	0.69192	26	56	34.689	4	0.12424	437.612	8.66214	8979.36	2574240	0.11429
Hrg	46028	0.88063	26	56	52.784	2	0.12424	457.787	8.79228	6014.53	2717504	0.14545
Cyp3a44	7392783	1.16369	26	54	25.891	4	0.12424	410.686	8.47416	5931.46	4430888	0.20685
Gadd45a	153246	0.93652	27	54	72.443	1	0.14199	472.486	8.92242	3067.12	1709824	0.1775
Cxcl13	2010000000	1.32735	27	54	109.384	1	0.14199	479.552	8.94981	563.483	254696	0.25157
Adrb1	377515	0.88849	26	54	83.214	1	0.14199	487.419	9.00841	3437.15	1470960	0.15793
Arg2	1520000000	1.17249	27	54	106.272	4	0.14199	491.669	9.03429	6726.02	7121776	0.22222
Mat1a	29404	0.84049	25	54	40.871	2	0.12424	434.729	8.64388	6062.36	2512328	0.13976
Il12a	988945	1.10945	25	52	92.893	1	0.12424	475.727	8.92394	706.232	298520	0.1991
Irak3	2890973	1.39462	23	52	99.584	1	0.12424	485.351	8.98558	7591.91	3343208	0.21719
Bcl10	419874	1.03788	26	52	101.86	1	0.14199	488.469	9.00537	783.894	447688	0.1991
Coro1a	2450000000	1.49147	23	52	93.56	2	0.14199	463.56	8.84175	5619.14	2720320	0.23379
Sult3a1	18579	0.79846	25	52	19.473	3	0.12424	405.379	8.41176	4973.22	1959456	0.14329
Ugt1a5	8723702	1.03002	26	52	36.045	3	0.12424	457.361	8.82272	6978.13	4077856	0.19759
Plcb4	378	0.52001	21	52	74.814	5	0.14199	481.31	8.97341	8380.99	3032728	0.0724
Adam8	121000000	1.29435	25	52	109.053	5	0.14199	476.052	8.92394	7180.8	5470392	0.23228
Kng2	1276	0.6267	22	52	73.125	2	0.14199	476.586	8.92698	7566.53	3936104	0.0905
Plat	17000000	1.32797	25	52	100.94	1	0.14199	491.569	9.03124	996.306	515480	0.23831
Cyp3a16	7391952	1.13224	26	52	20.272	1	0.12424	387.629	8.25651	1272.33	1241816	0.21719
Tnfrsf1b	646623	1.2096	21	50	90.109	3	0.12424	468.727	8.87675	2375.35	1191232	0.17959
Nfkbiz	217110	1.10945	25	50	82.216	1	0.12424	475.511	8.93307	790.414	385968	0.21551
Chil3	2390000000	1.67257	25	50	108.779	1	0.12424	477.911	8.94068	300.068	394136	0.3249
Card9	820269	1.15314	24	50	97.496	2	0.14199	479.469	8.94373	2777.91	1070000	0.20898
Ripk4	46	0.35765	13	50	42.631	2	0.14199	459.043	8.83718	8782.08	2289544	0.03429
Cyp17a1	116621	1.19074	22	50	18.802	2	0.14199	403.262	8.41556	4408.57	2179840	0.18612
Cyp2c37	8851059	1.28827	24	50	23.879	3	0.12424	399.671	8.36457	1905.04	873320	0.23347
Fpr1	383882	1.0254	25	50	101.143	1	0.14199	481.852	8.96503	629.533	362384	0.19918
Adcy1	83474	0.89307	21	50	34.405	2	0.14199	429.11	8.64235	5248.3	1718096	0.13061
Adamts4	479000000	1.1171	24	50	60.901	2	0.12424	470.394	8.89426	4306.7	1841488	0.20245
Ms4a6b	39500000000	1.59693	25	50	107.564	1	0.12424	439.194	8.67432	564.334	256368	0.3102
Clec4a2	250000000	1.60533	25	50	111.705	1	0.12424	455.511	8.7801	136.512	135864	0.31184
Pck1	24542	0.75644	25	50	49.716	1	0.14199	465.052	8.8973	6675.68	2573648	0.14694
Fosl2	71936	0.97296	24	48	80.012	1	0.14199	485.652	8.99852	1148.65	563456	0.19149
Ets2	79986	0.98184	22	48	75.007	2	0.14199	479.069	8.95971	4683.83	1599824	0.16667
Cyp2c40	8846904	1.24323	24	48	21.073	1	0.12424	405.262	8.42089	1596.27	1026064	0.24468
Twist1	48552	0.77476	24	48	84.475	3	0.14199	500.126	9.09213	3449.75	1733536	0.15248
Esam	6343	0.77728	19	48	67.783	4	0.14199	456.919	8.80598	8322.64	4399944	0.10461
Gnat1	347	0.54235	23	48	61.994	2	0.14199	468.676	8.90491	10003.3	10700000	0.09929
Pde4b	2488	0.76575	24	48	60.373	2	0.14199	482.16	8.98787	4426.78	2615976	0.15071
Ugt1a10	8722059	1.18029	22	46	30.485	16	0.12424	451.161	8.78771	4633.26	3077632	0.21836
Fmo3	17738	0.87164	23	46	15.622	1	0.12424	410.195	8.47645	3328.25	1895576	0.17391
Esrrb	113	0.46666	16	46	37.801	7	0.14199	455.193	8.82424	13035.8	4881136	0.05217
Marco	87600000	1.18155	23	46	95.979	1	0.14199	452.286	8.77858	484.659	309768	0.23575
Nfkbib	1920000000	1.51084	23	46	97.735	1	0.12424	489.077	9.01755	867.764	876984	0.30145
Mapk6	319	0.40736	22	46	57.824	2	0.14199	466.61	8.88893	4654.96	1866256	0.07536
Nlrc4	499388	0.90069	23	46	71.561	3	0.12424	471.994	8.90491	2524.47	1185536	0.17971
Bnip3	2032	0.67794	23	46	54.464	2	0.14199	450.036	8.79456	2488.54	870712	0.13527
Nedd4l	196	0.50925	19	46	61.07	8	0.14199	474.436	8.94829	7090.22	2150808	0.07343
Pde4d	87285	0.9917	19	46	37.335	1	0.14199	438.586	8.71085	6072.94	2287408	0.14879
Adamts3	479000000	1.30755	18	46	46.047	4	0.12424	444.754	8.73216	9850.39	3994928	0.17198
Cyp2c39	8854730	1.50352	21	46	16.307	1	0.12424	383.355	8.23748	959.911	624064	0.257
Map2k6	135	0.49951	18	46	55.973	2	0.14199	487.76	9.01222	10466.5	3295328	0.06763
Fabp4	16819	0.75205	22	46	59.159	4	0.14199	489.652	9.04038	6048.53	2216472	0.13913
Trem1	4733810	1.19829	21	46	91.874	3	0.12424	467.877	8.88056	5602.67	4854552	0.20483
Hamp	5123	0.84605	22	46	66.204	2	0.12424	480.686	8.96656	5990.4	2843488	0.15652
Cp	24406	0.94911	23	46	61.73	2	0.12424	469.186	8.89197	1403.52	780632	0.18937
Apcs	16101	0.98258	20	46	56.906	1	0.12424	475.744	8.92774	5687.76	2340504	0.15459
Ptpn2	52152	0.90872	22	44	88.424	2	0.14199	488.669	9.02059	1081.95	463776	0.18393
Fes	1809	0.73707	19	44	88.433	4	0.14199	477.943	8.96123	1778.04	668496	0.11628
Ifnar1	5267282	1.26385	22	44	98.285	1	0.14199	476.269	8.93764	254.357	109872	0.25581
Pmaip1	409326	0.97139	22	44	70.751	3	0.14199	471.519	8.92546	1652.14	986784	0.19662
Arl15	34	0.46652	8	44	24.68	7	0.14199	447.179	8.77401	14849.9	4558048	0.02748
Runx1	840	0.66848	22	44	62.851	2	0.12424	477.927	8.95742	3204.54	1263592	0.13531
Tenc1	1943	0.77728	19	44	70.052	2	0.14199	459.836	8.83033	5006.73	2554952	0.12262
Adcy4	83449	1.0185	19	44	42.372	1	0.12424	434.618	8.67736	2918.78	964816	0.16279
Prkch	63	0.42096	17	44	68.353	1	0.14199	470.86	8.91481	3504.68	1422752	0.05708
Adamts2	479000000	1.11769	20	44	43.604	2	0.12424	427.554	8.61343	5009.13	1997424	0.19239
Atp2a2	2931	0.56286	19	44	43.484	7	0.14199	452.826	8.82272	14383.5	6145496	0.08879
Abca1	5600	0.89742	16	44	72.754	6	0.14199	482.752	8.98863	13381.6	4894536	0.10571
Hbegf	13819	0.95495	18	42	75.185	7	0.14199	486.202	9.00765	1440.32	684040	0.15099
Klf2	4646	0.91568	21	42	84.412	4	0.12424	488.901	9.0282	1631.78	1140984	0.18815
Mcam	10000000	1.61607	18	42	91.464	7	0.14199	485.102	9.00461	7845.62	3421536	0.25552
Cd93	7347624	1.14177	21	42	95.086	1	0.14199	457.686	8.81054	822.18	375080	0.23461
Trp63	1205	0.67581	18	42	53.72	10	0.14199	476.193	8.96123	6040.2	2151584	0.10685
Nfil3	40606	0.93332	16	42	64.016	2	0.12424	465.144	8.86686	4199.72	1518040	0.12776
Btg2	3848	0.92469	19	42	47.925	3	0.12424	447.027	8.76412	5128.72	2232296	0.16028
Rhod	155	0.50357	20	42	54.36	2	0.16565	461.267	8.86077	4951.81	2235464	0.09524
Srgn	4356210	1.00611	21	42	85.903	1	0.14199	462.719	8.84631	857.701	404360	0.20674
Tns1	2853	0.81063	20	42	69.948	2	0.14199	462.069	8.84936	1997.52	1386000	0.15331
Comp	1965	0.82291	20	42	75.69	1	0.12424	455.161	8.81739	1809.11	802984	0.15563
Pnpla2	33911	1.0431	18	42	48.38	3	0.14199	478.119	8.97188	5433.56	1880168	0.16492
Ccl17	4360000000	1.78614	21	42	101.723	1	0.12424	466.877	8.88513	55.3713	46288	0.36702
Slc2a1	92	0.40204	19	42	43.847	3	0.14199	473.819	8.95362	10214.7	3144576	0.06969
Prtn3	43632	1.07394	21	42	84.607	1	0.12424	473.111	8.92089	551.823	307848	0.22067
Tdo2	11633	0.93332	16	42	34.724	4	0.12424	472.786	8.91937	8403.74	2302816	0.12079
Lyve1	7887	0.9917	19	40	84.767	1	0.12424	452.127	8.79	853.915	520912	0.18974
Ccng2	513	0.71239	17	40	39.057	1	0.14199	441.052	8.73748	4231.44	1494416	0.11282
Rnd1	106	0.5205	16	40	49.89	1	0.16565	433.333	8.67051	3145.34	1134296	0.07436
S100a8	1240	0.83742	18	40	76.966	2	0.12424	472.851	8.92013	7088.05	5216056	0.14615
Anxa1	6419	0.83088	19	40	79.651	4	0.14199	481.786	8.97949	3650.14	2553968	0.15897
Rapgef3	1131	0.73707	19	40	36.946	4	0.14199	442.819	8.74281	4772.29	1997384	0.14103
Rapgef4	224	0.50357	20	40	36.26	1	0.14199	442.802	8.73977	3803.44	1257640	0.10513
Col4a1	18218	0.94026	18	40	70.247	3	0.14199	468.252	8.90111	2621.1	874432	0.1641
Txnip	466	0.57297	18	40	59.535	3	0.14199	490.436	9.03581	7287.44	2358248	0.1
Lrp5	1045	0.77716	17	40	59.455	1	0.12424	477.511	8.97188	3869.84	1336688	0.12308
Orm1	41964	0.95802	20	40	45.149	1	0.12424	410.679	8.47873	462.495	217824	0.2
Itih3	17716	0.98433	18	40	30.211	1	0.12424	417.962	8.53048	2897.59	1122024	0.17179
Gab2	11086	0.78607	20	40	79.143	1	0.14199	483.276	8.99852	1772.89	890384	0.1641
Il1r2	259218	1.12571	19	38	76.474	1	0.12424	469.094	8.90339	2604.81	1005496	0.23898
Efna1	1891	0.96921	16	38	69.206	2	0.14199	459.586	8.85468	1491.06	509576	0.15363
Map3k8	453658	1.38205	15	38	61.272	3	0.12424	473.994	8.9384	3514.32	1574016	0.1963
Smg1	31	0.4296	9	38	32.846	9	0.14199	450.726	8.81207	14946.3	7552240	0.03698
Dnmbp	42	0.43429	13	38	34.363	1	0.14199	427.986	8.63855	5709.91	2277008	0.04836
Gadd45b	3593	1.02306	16	38	65.464	1	0.14199	461.636	8.86838	1390.59	457680	0.16216
Saa3	5654	0.88449	19	38	70.017	1	0.12424	461.027	8.84098	1439.1	941528	0.18777
S100a9	1004	0.71239	17	38	63.232	7	0.12424	453.094	8.78695	7270.63	6281528	0.12518
Robo4	1011	0.75383	16	38	54.63	6	0.14199	459.736	8.86001	9997.81	4127080	0.11949
Prkg1	36	0.65858	7	38	39.384	3	0.14199	448.119	8.7801	5672.9	1887640	0.04552
Ackr2	95400000	1.71891	18	38	94.5	3	0.12424	463.019	8.85621	2605.01	1529280	0.33286
Cd36	827	0.7582	10	38	67.289	1	0.14199	466.452	8.90263	2416.2	1238472	0.10811
Fbxo32	3205	0.89742	16	38	55.244	1	0.14199	479.986	8.98178	3981.76	1320216	0.14225
Entpd3	88018	1.13335	17	38	34.062	4	0.14199	425.552	8.62789	9034.69	9185816	0.19915
Serpina3m	3032	0.84429	19	38	53.656	1	0.12424	441.937	8.71389	1250.23	757728	0.17923
Efnb2	7355	0.9414	15	36	56.424	4	0.12424	457.887	8.84022	5884.72	2333456	0.14921
Gata6	444	0.85585	14	36	54.128	5	0.12424	473.085	8.94601	5018.61	2201320	0.12063
Por	424	0.69999	16	36	31.976	5	0.12424	452.811	8.81054	4857.5	2955648	0.12381
Sult2a1	15451	1.14954	17	36	17.904	3	0.12424	396.362	8.39426	834.912	320416	0.2254
Vsig4	175225	1.31145	17	36	74.859	2	0.12424	443.344	8.71998	913.591	281952	0.25714
Wnt4	247	0.7411	15	36	41.004	5	0.14199	466.802	8.91937	7822.19	2644112	0.11746
Fst	361	0.89412	13	36	44.98	3	0.14199	453.102	8.82196	3561.54	1158096	0.11111
Rhobtb1	34	0.3321	13	36	37.204	1	0.16565	434.317	8.68802	3252.27	1486392	0.05079
Slc1a5	491	0.6962	17	36	27.148	15	0.12424	472.361	8.9384	14731.1	4139456	0.13651
Arhgap9	4072377	1.2305	17	36	64.456	1	0.14199	440.91	8.71009	1702.13	585224	0.24127
Ntf3	5970	0.94594	14	36	58.885	7	0.14199	475.652	8.95818	10083.3	3203408	0.13651
Pde2a	87455	1.13335	17	36	26.488	3	0.12424	414.744	8.54799	3256.22	1472760	0.22222
Pde7b	86456	1.35395	13	36	25.496	2	0.12424	421.035	8.60582	5875.88	1853816	0.17778
Lpin1	1579	0.79193	13	36	31.129	5	0.14199	434.986	8.71846	6384.56	2414664	0.10159
Slc22a26	11187	0.92287	17	36	14.29	3	0.12424	404.162	8.44372	2974.34	1523280	0.18095
Bhmt	1676	0.84358	16	36	20.272	1	0.12424	416.962	8.56168	3522.26	1541264	0.14921
Got1	193	0.70104	15	36	15.975	3	0.12424	406.862	8.47569	7289.21	2710480	0.11111
Chd1	142	0.57691	11	34	23.06	5	0.14199	448.876	8.78923	7371.53	2319416	0.06774
F13a1	5035	1.1128	16	34	81.488	1	0.12424	451.094	8.78847	1061.96	428752	0.22103
Pik3c2g	80	0.46068	15	34	49.929	2	0.16565	451.533	8.80217	2898.19	1008696	0.082
Pik3r5	120	0.46953	17	34	53.067	1	0.14199	458.619	8.84631	2424.9	823928	0.10339
Ppp1r15a	609	0.90089	14	34	50.411	5	0.14199	448.919	8.79761	5559.6	2592328	0.14617
Zfp36	8283	1.09485	16	34	59.533	3	0.12424	467.801	8.90567	1851.01	1071640	0.21747
Rnasel	506	0.68101	15	34	66.822	2	0.14199	485.26	9.02059	4059.49	1657432	0.12478
Cdk17	150	0.68975	13	34	26.91	9	0.14199	437.793	8.72683	10414.5	3716232	0.09626
Cyp3a41a	18294	1.08478	17	34	17.244	2	0.11044	380.033	8.21008	1272.29	522088	0.23886
Pde6h	43076	1.18192	17	34	28.169	1	0.12424	416.101	8.56397	430.733	260808	0.26025
Spon1	479000000	1.93182	12	34	30.377	2	0.12424	415.461	8.54037	6911.32	2692160	0.23529
Adamts14	479000000	1.50223	15	34	27.999	2	0.12424	413.354	8.52668	3757.2	1496536	0.26738
Slco1a4	307	0.76576	14	34	11.664	3	0.12424	401.252	8.43687	4677.56	1736744	0.12478
Clec5a	68042	1.31145	17	34	78.292	1	0.12424	440.961	8.70552	157.417	62664	0.28877
A1bg	30873	1.35395	13	34	40.946	4	0.12424	460.594	8.84403	9429.12	3757072	0.19964
Ass1	938	0.76097	17	34	27.129	2	0.12424	424.779	8.62257	4311.54	5312904	0.16756
Cyp26a1	8709362	1.73422	14	32	17.433	2	0.12424	384.07	8.28086	870.934	401976	0.31048
Cyp3a13	747698	1.34613	16	32	16.032	1	0.12424	375.214	8.18954	177.232	329336	0.30242
Procr	184609	1.38205	15	32	75.866	2	0.12424	463.461	8.87295	322.264	217080	0.27823
Dok3	3716042	1.59908	14	32	73.988	1	0.14199	443.76	8.73672	3624.68	1870904	0.28629
Fkbp5	18	0.56839	4	32	25.692	7	0.12424	447.961	8.79456	6554.71	1811256	0.02016
Hmox2	1764	0.87947	16	32	63.401	2	0.12424	476.761	8.95895	864.092	574600	0.19758
Git1	62	0.61085	11	32	50.427	1	0.14199	453.802	8.8212	1633.91	730000	0.08065
Zc3h12a	7695	1.02152	15	32	56.881	1	0.12424	457.911	8.84327	1785.25	672568	0.20565
Igfbp3	2101	0.96143	15	32	65.209	1	0.14199	481.286	8.99319	1866.27	736416	0.19355
Rbfox3	11009	0.98146	15	32	67.482	2	0.14199	480.019	8.99319	2663.84	1421288	0.19758
Pdk4	11116	0.91537	16	32	41.151	1	0.14199	444.169	8.78543	991.923	381880	0.20565
Angptl4	2323	0.82122	15	32	57.28	3	0.12424	470.994	8.9247	3864.95	1918824	0.16532
Lpar1	355	0.76639	13	32	65.163	3	0.14199	479.576	8.98178	4056.79	1327408	0.12097
Adamtsl2	479000000	1.68917	14	32	34.852	1	0.12424	418.627	8.56549	3129.99	1630632	0.30242
Pdlim1	235	0.72107	15	32	42.003	4	0.14199	444.102	8.75194	4224.48	1598192	0.14516
Tmprss2	20	0.47549	6	32	19.45	2	0.14199	448.026	8.80522	11500.8	3785200	0.02419
Asl	1028	0.87947	16	32	27.115	1	0.12424	426.445	8.63703	4037.42	5633992	0.19758
Cth	258	0.68204	16	32	22.588	2	0.12424	420.462	8.59213	3463.3	1960016	0.15323
Gnmt	11732	1.17116	14	32	21.037	1	0.12424	403.279	8.44601	1951.92	643520	0.20968
Cyp3a41b	737617	1.50899	14	30	11.675	1	0.12424	374.414	8.18573	372.963	717344	0.30805
Heph	3878	1.00149	15	30	45.242	1	0.12424	444.504	8.7664	929.099	355464	0.22989
Ccrl2	167880	1.38205	15	30	77.008	1	0.12424	460.594	8.85164	36.9594	16224	0.31724
Stab2	103	0.7981	10	30	50.051	8	0.12424	447.161	8.77173	12205	7455352	0.09195
Gpc3	47	0.55867	10	30	36.404	4	0.12424	452.787	8.81891	4991.1	1723488	0.06897
Ddit4	93	0.58558	14	30	34.561	6	0.12424	431.094	8.68802	1496.22	474264	0.11954
Atg16l1	5210	0.94521	13	30	46.592	2	0.12424	454.811	8.81435	4620.74	1653648	0.17011
Socs2	468	0.72107	15	30	53.308	1	0.14199	458.786	8.85088	3659.92	1695032	0.16552
Adcy10	83189	1.32881	14	30	25.813	1	0.12424	405.744	8.48177	1181.87	423856	0.27126
Ednra	761	0.8108	14	30	51.567	1	0.14199	458.019	8.86686	1092.37	404424	0.16552
Aass	886	1.15383	11	30	20.138	4	0.12424	406.929	8.48862	9372.19	4671208	0.15632
Serpina3n	10174	0.88131	15	30	50.967	1	0.12424	428.187	8.6317	310.178	194296	0.2023
Igfbp1	192	0.79193	13	30	51.039	1	0.14199	480.052	8.99624	2635.82	941264	0.14253
Nrip1	34	0.40978	12	28	34.55	7	0.14199	446.269	8.7801	6374.17	2846392	0.07407
Irf6	90	0.5854	12	28	37.389	5	0.14199	442.936	8.75651	8588.55	4141864	0.10582
Grb10	72	0.83801	10	28	39.639	12	0.14199	474.793	8.95971	5814.17	2290928	0.11111
Rabgef1	16	0.56839	4	28	16.467	3	0.14199	400.369	8.43687	9649.92	6627960	0.02116
Pmp22	403204	1.71593	10	28	50.615	1	0.12424	433.677	8.66214	2145.49	734392	0.2328
H3f3b	163	0.53647	13	28	30.346	4	0.14199	440.552	8.7489	4767.83	1861440	0.11111
Il17ra	5928	1.19368	14	28	68.129	1	0.12424	453.927	8.80978	37.3884	14400	0.28042
Timd4	2637	1.20067	13	28	61.753	1	0.12424	443.344	8.73824	155.951	129200	0.24868
Wnt11	169	0.63865	13	28	27.357	4	0.12424	441.854	8.7626	4781.67	1569344	0.13228
Hif3a	1017	0.9963	13	28	48.407	5	0.12424	454.361	8.83794	3585.91	1518768	0.20635
Malt1	1160	0.92341	14	28	53.841	3	0.14199	437.719	8.70628	1206.34	508912	0.21693
Notch4	1494	1.39955	8	28	39.205	6	0.12424	444.027	8.77401	13159.2	5190200	0.13757
Slc3a1	368	1.10798	8	28	6.517	1	0.11044	381.433	8.26412	3518.24	965360	0.10053
Slc38a4	39	0.73175	7	28	16.086	4	0.14199	411.902	8.53505	7141.01	2654640	0.0582
Zbtb16	66	0.71829	10	28	55.572	1	0.14199	458.186	8.86001	609.756	219720	0.09524
Trpc1	33	0.47511	11	28	26.37	4	0.14199	430.902	8.68726	7769.31	3086088	0.07407
Ucp2	31092	1.2162	14	28	39.784	4	0.14199	469.486	8.93535	1008.35	546104	0.28571
Pde1b	46116	1.14864	14	28	26.629	1	0.12424	409.661	8.52972	361.318	192528	0.26984
Gpnmb	1448	1.22461	8	28	49.047	2	0.12424	431.854	8.66214	2495.03	671408	0.11111
Sds	324	1.03602	14	28	14.097	1	0.12424	379.905	8.24281	440.129	180632	0.24339
Hal	72	0.93303	8	28	23.237	6	0.14199	414.812	8.55179	4820.77	2391416	0.08466
Nags	975	0.9963	13	28	21.112	4	0.12424	401.995	8.44448	6884.56	7376544	0.20635
Lrg1	30274	1.08107	14	28	36.403	1	0.12424	418.402	8.57843	347.601	229816	0.25397
Wif1	146	0.81146	9	26	23.728	10	0.14199	445.786	8.79228	3873.97	1306632	0.10462
Rnd2	23	0.39905	10	26	37.563	3	0.16565	423.95	8.61496	1571.95	771072	0.06154
Pla2g12a	14402	1.52713	11	26	10.841	2	0.11044	352.651	7.946	2822.23	5057672	0.27692
Slc38a2	300	0.81447	11	26	8.467	2	0.12424	379.398	8.25727	1847	662528	0.14769
Cyp1b1	164	0.67872	11	26	16.025	3	0.12424	411.187	8.52439	1721.22	607296	0.12308
Ptprb	316	0.98415	11	26	48.112	1	0.12424	437.77	8.71541	739.258	282920	0.17846
Clip1	14	0.61795	3	26	3.949	10	0.14199	364.526	8.11039	14201.8	9228968	0.01846
Fzd8	135	0.63848	10	26	24.525	1	0.12424	425.761	8.63094	2820.5	831760	0.09846
Setd7	158	0.61311	13	26	23.963	1	0.14199	430.102	8.68573	2970.48	1275248	0.14769
Blm	193	0.70248	12	26	16.629	2	0.14199	421.302	8.61724	3303.13	1070144	0.14769
Hnrnpa1	22	0.77792	5	26	22.793	11	0.14199	432.152	8.69334	10822	4458648	0.04308
Samsn1	10946	1.32351	11	26	58.26	3	0.14199	434.469	8.67736	723.565	216328	0.24
Tnnt2	253	0.99135	8	26	41.131	9	0.12424	450.218	8.82653	9962.23	10800000	0.11077
Nr4a2	70	0.71266	11	26	46.419	2	0.14199	452.952	8.82881	2937.4	1337464	0.12923
Slc2a3	32	0.57279	9	26	29.733	5	0.14199	448.486	8.81283	7347.21	2389968	0.07385
Trpv4	30	0.57279	9	26	29.139	7	0.14199	430.879	8.68421	6015.65	2855648	0.07385
Saa1	360	0.91966	13	26	40.481	1	0.12424	450.419	8.79152	743.622	428304	0.22154
Fcna	7244	1.04739	13	26	58.161	2	0.12424	432.087	8.65225	246.771	134056	0.25231
Dot1l	178	0.63865	13	26	21.262	5	0.14199	431.552	8.69791	5627.75	2166984	0.15385
Cmklr1	5199	0.96591	12	26	53.136	1	0.12424	442.427	8.73596	828.036	318808	0.20308
Adamts15	479000000	1.81378	13	26	25.782	1	0.12424	403.437	8.45286	69.409	31896	0.43692
Thsd1	479000000	1.93182	12	26	29.958	1	0.12424	404.487	8.46275	360.13	60672	0.40615
Thsd7a	479000000	1.93182	12	26	26.925	1	0.12424	403.42	8.46123	396.816	69200	0.40615
Ctsl	81	0.61467	12	26	46.976	1	0.14199	455.302	8.8387	959.244	349352	0.12923
Adamtsl4	479000000	1.93182	12	26	24.452	1	0.12424	401.47	8.44144	173.647	27360	0.40615
Ednrb	652	1.05202	11	26	47.458	1	0.14199	446.86	8.78619	1287	773064	0.19077
Mfsd7b	2042	1.35678	10	24	33.919	2	0.12424	427.162	8.64768	1227.16	360208	0.24638
Rasgef1b	22	0.52483	8	24	33.611	7	0.14199	463.402	8.88893	6041.72	1706344	0.06522
Mbip	749	1.31715	7	24	7.911	5	0.14199	381.629	8.29836	10122.7	4635808	0.13043
Klf15	106	0.64394	12	24	23.44	1	0.12424	419.32	8.6142	1873.6	667856	0.15942
Gstt3	10252	1.08299	12	24	13.773	1	0.12424	375.731	8.21465	401.923	103496	0.26812
Sult1e1	12816	1.4635	12	24	11.091	1	0.12424	365.481	8.11724	36.6697	19968	0.36232
Creb5	266	0.70248	12	24	39.479	1	0.14199	445.119	8.78315	683.855	242032	0.17391
Slc39a14	638	0.90737	12	24	29.296	3	0.12424	452.902	8.81511	769.067	315768	0.22464
Ccno	65	0.95128	7	24	13.33	5	0.12424	397.304	8.42774	6122.26	2512488	0.1087
Ing3	752	0.83801	10	24	14.729	1	0.14199	412.126	8.55636	3369.68	1831640	0.15217
Csnk1e	28	0.47886	10	24	27.2	2	0.14199	429.852	8.68649	1166.16	307536	0.08696
Bmx	48	0.49759	12	24	52.439	1	0.14199	468.136	8.91252	244.141	160936	0.12319
Cytip	310	0.99763	10	24	45.149	1	0.14199	435.526	8.69258	1279.89	449384	0.18116
Atg14	194	0.73175	12	24	29.196	3	0.14199	422.369	8.61952	832.156	275704	0.18116
Klhl24	32	1.13679	4	24	10.914	2	0.12424	403.671	8.46351	4888.68	1253624	0.05072
Ier3	913	1.2217	11	24	40.157	1	0.14199	421.029	8.60278	306.03	102880	0.26087
Tfdp2	32	1.13679	4	24	16.664	3	0.14199	416.038	8.57006	5722.52	1955320	0.05072
Cab39l	12	0.61557	2	24	11.81	2	0.12424	384.123	8.30597	5386.88	2378200	0.00725
Pstpip1	44	0.55867	10	24	41.22	1	0.14199	424.402	8.61648	1067.5	304848	0.10145
Naip5	394	0.81956	12	24	34.698	2	0.12424	412.787	8.53733	698.06	375376	0.2029
Gadd45g	279	1.00239	9	24	30.25	2	0.14199	440.245	8.74814	3347.06	1122968	0.15217
Rgs2	47	0.8781	7	24	26.214	4	0.14199	435.776	8.72455	3937.79	1084096	0.08696
Nipal1	868	1.28292	8	24	6.675	1	0.12424	369.621	8.13855	1998.84	486352	0.15942
Pde6c	1039	1.11989	11	24	24.028	1	0.12424	411.427	8.54418	583.734	351336	0.23913
Timp4	179	0.91628	11	24	39.642	3	0.12424	425.686	8.63627	2208.19	986968	0.19565
Orm3	178	1.04966	8	24	21.402	3	0.12424	398.279	8.4011	6037.24	3833648	0.14493
Ier2	868	1.28292	8	24	41.029	2	0.14199	450.852	8.81435	3665.87	1132976	0.15942
Slc38a1	439	1.07744	10	22	8.001	2	0.12424	370.881	8.1941	1897.86	756480	0.23377
Jdp2	134	0.78053	11	22	41.085	3	0.14199	467.669	8.92318	266.524	199776	0.19913
Ppargc1b	291	1.16629	8	22	31.744	3	0.12424	432.444	8.71009	1075.67	342944	0.18182
Klb	59	0.75809	8	22	32.465	7	0.14199	445.193	8.80217	7618.38	2932208	0.11255
Dyrk1a	23	0.5854	7	22	28.652	3	0.14199	426.252	8.65757	3423.98	1406312	0.08658
Cyp39a1	500	1.14559	9	22	9.358	1	0.12424	359.631	8.04646	630.723	124744	0.20779
Cyp4f18	2894	1.38425	9	22	15.729	1	0.12424	405.862	8.47264	1760.84	1291192	0.25974
Lmo4	17	0.64826	5	22	25.655	5	0.12424	458.994	8.86686	4177.07	915568	0.06061
Map4k4	43	0.63848	10	22	26.359	5	0.12424	433.077	8.69487	1589.93	503976	0.13853
Crtc2	249	0.99135	8	22	27.935	4	0.14199	427.736	8.68041	4031.26	1391232	0.14719
Gfra1	24	0.90757	5	22	20.513	2	0.14199	416.486	8.5906	699.706	177952	0.06061
Gucy2c	123	0.91782	10	22	17.835	1	0.12424	402.37	8.47264	545.026	231504	0.19913
Cngb3	81	0.7981	10	22	14.848	1	0.12424	387.851	8.3524	558.865	130632	0.17316
Osmr	2888	1.33652	9	22	44.68	2	0.12424	454.377	8.83414	3191.78	992088	0.24242
Hmgb2	66	0.57691	11	22	47.379	2	0.14199	459.002	8.86305	1123.89	561920	0.14719
Pcsk5	31	1.13679	4	22	37.249	3	0.14199	422.479	8.61648	1763.61	563016	0.05195
Cd300lg	127	1.29653	5	22	25.654	3	0.12424	412.944	8.53809	4951.59	1664864	0.11255
Spry1	18	0.51223	7	22	32.107	2	0.12424	436.144	8.71389	2271.19	625360	0.06061
Epha4	134	0.71599	9	22	35.923	1	0.14199	421.936	8.61572	1244.74	452728	0.13853
Pi4k2b	12	0.61795	3	22	15.985	4	0.14199	409.569	8.53657	6193.54	2324216	0.03463
Rgma	84	0.76373	9	22	22.656	3	0.12424	413.786	8.56321	1249.91	332928	0.14719
Pole4	735	0.83801	10	22	8.984	2	0.14199	374.812	8.23824	892.127	203200	0.18182
Rbbp8	183	1.10798	8	22	12.885	1	0.14199	401.602	8.47036	914.499	219896	0.17316
Clec1b	290	0.88234	11	22	54.217	1	0.12424	427.927	8.63779	35.3066	11896	0.22511
Wasf2	31	0.55867	10	22	24.336	3	0.14199	415.843	8.56092	1945.13	1534152	0.12121
Klf6	1706	1.08596	11	22	44.88	1	0.12424	442.061	8.75727	129.207	41272	0.27706
Map3k9	41	1.04608	6	22	26.64	5	0.12424	435.694	8.71085	4414.35	1291552	0.09524
Slc7a2	20	0.5854	7	22	20.726	3	0.12424	417.687	8.59136	3751.19	1241576	0.06926
Saa2	270	0.95021	11	22	33.737	3	0.12424	447.252	8.77325	970.411	645576	0.24242
Hspa2	14	0.92693	3	22	14.225	4	0.12424	418.811	8.60506	7605.92	2891160	0.03463
Fmn2	19	0.46652	8	22	12.329	1	0.14199	377.895	8.25042	4769.98	1982936	0.06926
Anln	19	0.94732	4	22	8.472	3	0.14199	397.836	8.43611	3726.65	979464	0.05195
Ank3	12	0.61795	3	22	21.473	5	0.14199	421.052	8.61115	6465.2	2855856	0.02597
Gpihbp1	14	0.51861	5	22	22.845	4	0.12424	404.395	8.47493	4265.44	3460976	0.04329
Jam2	403344	1.62893	11	22	50.198	1	0.12424	427.961	8.62561	21.8186	17784	0.41558
Rasl10b	18	0.51223	7	22	15.708	3	0.12424	413.451	8.56473	3216.53	855664	0.06061
Rasd1	31	1.13679	4	22	16.677	1	0.12424	413.418	8.56168	1815.85	588224	0.06061
Nid1	115	0.87792	10	22	45.427	1	0.14199	440.612	8.73444	221.566	100216	0.19048
Slc10a2	44	0.62053	9	22	16.987	1	0.12424	411.461	8.53961	1737.3	580048	0.11255
Serpina3i	540	1.11989	11	22	40.03	1	0.12424	426.279	8.63322	70.4133	32896	0.28571
Sult2a2	10812	1.2217	11	22	8.718	1	0.12424	364.679	8.10126	113.282	49704	0.31169
Slc7a6	433	1.19332	9	20	5.76	2	0.12424	359.705	8.08832	2689.99	999568	0.26316
Tnip1	45362	1.39668	10	20	40.967	1	0.12424	408.12	8.50841	41.6235	20144	0.36842
Klf1	59	0.71599	9	20	35.184	3	0.14199	453.169	8.83794	956.569	328656	0.15789
Mapkapk2	31	0.73175	7	20	19.123	6	0.14199	434.236	8.71694	9214.97	5384024	0.10526
Lemd3	18	0.94732	4	20	6.99	5	0.14199	381.171	8.28999	7418.73	2827048	0.06316
Gpx3	130	0.8781	7	20	23.365	8	0.12424	458.877	8.86229	3477.91	1506160	0.15789
Tnfaip6	100	0.93303	8	20	50.418	4	0.12424	462.577	8.89197	2162	814808	0.16842
Slpi	730	1.04966	8	20	37.775	3	0.12424	445.169	8.76031	4070.89	1858760	0.18947
Sh2b3	25	0.57279	9	20	45.075	1	0.14199	442.902	8.75042	144.795	88696	0.12632
Lyl1	85	0.81146	9	20	29.261	3	0.12424	418.813	8.58984	996.468	379088	0.17895
Cntfr	2887	1.33652	9	20	39.15	1	0.12424	452.494	8.82424	210.815	53752	0.29474
Sult1a1	866	1.28292	8	20	12.87	1	0.11044	384.773	8.29836	928.309	225896	0.23158
Chst11	36	0.85588	6	20	19.329	3	0.12424	399.871	8.43155	1698.04	508672	0.09474
Cdyl	13	0.51861	5	20	5.236	2	0.12424	365.937	8.15377	4541.09	1780016	0.05263
Pvr	123	0.90692	9	20	49.661	1	0.12424	433.761	8.67127	106.058	43744	0.2
Klhl6	98	1.04966	8	20	37.292	1	0.12424	415.585	8.55636	1998.87	712808	0.18947
Muc2	86	0.93303	8	20	48.078	4	0.14199	458.286	8.86229	4035.16	1326176	0.17895
Cd300lf	172	0.99135	8	20	49.376	1	0.12424	426.601	8.63398	251.477	90048	0.17895
Rsad2	171	1.1708	7	20	36.233	4	0.14199	447.052	8.78162	3333.21	993304	0.16842
Lgmn	1456	1.03754	10	20	45.966	1	0.12424	421.187	8.59517	74.7237	37528	0.27368
Sesn1	172	0.7981	10	20	24.89	2	0.12424	399.102	8.44753	1497.91	1595880	0.21053
Maff	973	1.24106	9	20	34.683	1	0.12424	430.394	8.68117	1028.15	668360	0.27368
Tnfrsf12a	52	0.8164	8	20	37.984	1	0.12424	452.919	8.81435	135.048	44600	0.14737
Odf2	40	0.95098	6	20	2.537	1	0.12424	340.564	7.87066	2872.97	923488	0.11579
Nin	47	0.66826	9	20	3.59	2	0.14199	347.921	7.95894	2989	920440	0.14737
Arhgap25	80641	1.67065	9	20	49.135	1	0.14199	425.026	8.6142	656.289	231520	0.36842
Apobr	125	1.29653	5	20	13.607	1	0.12424	373.562	8.204	2104.16	1084824	0.10526
Cacna1b	14	0.75786	4	20	9.198	6	0.12424	402.144	8.46579	8916.64	3016464	0.05263
Naip1	274	0.83801	10	20	26.112	1	0.12424	399.095	8.4384	464.833	246480	0.22105
H2-Q6	769	1.09786	9	20	55.894	2	0.12424	425.111	8.61267	219.513	61344	0.24211
Med13l	10	0.61557	2	20	15.271	3	0.14199	411.995	8.55255	4444.93	1544592	0.03158
Kif18a	15	0.75786	4	20	9.433	3	0.14199	393.345	8.40263	6906.28	3259832	0.06316
Rrm2	27	0.73175	7	20	20.883	1	0.14199	434.21	8.72455	4019.69	1713008	0.11579
Tmem119	10083	1.33652	9	20	54.256	2	0.12424	437.577	8.70552	2194.27	860840	0.29474
Ccp110	30	0.64146	8	20	2.054	1	0.14199	357.355	8.05179	3044.75	960224	0.11579
Ahi1	19	0.77792	5	20	3.974	2	0.12424	365.477	8.1355	5402.49	1999640	0.06316
Ampd3	5066	1.39955	8	20	19.981	2	0.12424	403.011	8.48634	2193.62	748888	0.25263
Mmp25	20	0.77792	5	20	39.268	1	0.14199	450.369	8.80141	285.749	138040	0.08421
Rhbdf2	15	0.64826	5	20	18.192	5	0.14199	426.979	8.65377	8819.58	3071360	0.07368
Adm	38	0.73175	7	20	37.605	3	0.12424	456.844	8.84936	5037.98	1491672	0.12632
Chaf1b	12	0.56839	4	20	9.427	2	0.12424	385.254	8.32272	5096.63	2417048	0.04211
Stx3	20	0.5854	7	18	8.934	4	0.12424	398.496	8.44448	3801.89	1320144	0.10458
Tnip2	40326	1.43199	9	18	33.973	1	0.12424	399.262	8.44068	3.71843	896	0.39216
Psmd9	130	0.95128	7	18	30.813	3	0.14199	407.069	8.50537	3248.91	3139928	0.16993
Ldb1	77	0.8164	8	18	23.407	1	0.12424	409.546	8.52591	242.516	64992	0.18301
Mcrs1	747	1.10798	8	18	5.84	1	0.14199	368.045	8.18877	238.917	46968	0.24837
Il22ra1	505	1.28292	8	18	36.625	2	0.12424	454.261	8.84403	442.754	145632	0.28758
Epc2	729	1.04966	8	18	24.406	1	0.14199	446.093	8.80065	3037.49	1218576	0.23529
Gja4	130	0.95128	7	18	32.438	4	0.12424	419.637	8.60126	7858.07	4941632	0.18301
Rasd2	13	0.75786	4	18	8.459	2	0.12424	389.818	8.38588	1142.76	353232	0.05229
Plekhg5	20	0.90757	5	18	17.307	4	0.14199	397.638	8.42926	4462.67	1622232	0.0915
Strip2	10	0.61795	3	18	11.569	3	0.14199	396.655	8.42013	1643.11	318424	0.03922
Zfp37	31	0.76079	6	18	6.22	2	0.12424	375.962	8.2527	1081.99	274456	0.11765
Sun2	23	0.76079	6	18	4.427	2	0.14199	373.679	8.23444	5723.26	1833760	0.10458
Treml2	264	1.05012	9	18	28.024	2	0.12424	400.051	8.43155	186.287	127552	0.28758
Lbp	151	0.93303	8	18	37.328	3	0.12424	454.544	8.82272	364.616	254544	0.20915
Ifi30	33	0.85588	6	18	33.847	1	0.12424	424.744	8.61267	1674.07	573752	0.11765
Cntrl	34	1.03722	5	18	4.202	2	0.14199	363.719	8.14692	4555.46	1538648	0.11765
Masp1	10081	1.57449	8	18	34.605	1	0.12424	399.779	8.4247	38.4868	16264	0.35294
Ptch2	12	0.92693	3	18	14.386	1	0.12424	410.477	8.55255	2466.37	635192	0.06536
Plk3	14	0.64826	5	18	15.96	1	0.14199	404.295	8.49776	2543.48	806920	0.06536
Slfn2	267	1.04966	8	18	37.021	1	0.12424	398.83	8.42698	102.691	34912	0.23529
Sesn2	160	0.85919	9	18	22.55	1	0.12424	397.936	8.44524	1352.43	1519728	0.23529
Muc16	13	0.75786	4	18	25.243	4	0.12424	426.854	8.64996	7755.21	5221248	0.05229
Slc8a1	13	0.47549	6	18	8.98	2	0.12424	376.07	8.2527	2422.31	840952	0.06536
Csrnp1	124	1.29653	5	18	20.495	1	0.12424	396.132	8.41709	2473.57	638576	0.13072
Mcf2l	9	0	1	18	6.839	8	0.14199	378.488	8.27934	10661.4	3594000	0
Trim24	32	0.51861	5	18	15.915	1	0.12424	414.802	8.57082	1542.08	513248	0.13072
Pla2g7	127	0.75809	8	18	16.865	1	0.12424	398.362	8.43079	1320.52	1172072	0.16993
Pim3	17	0.94732	4	18	20.202	5	0.14199	431.119	8.69715	2335.8	827000	0.06536
Epb4.1	10	0.61795	3	18	16.367	3	0.14199	417.626	8.59593	4297.24	1276424	0.03922
Cbx2	16	0.51223	7	18	19.843	1	0.14199	426.402	8.66442	762.529	264040	0.0915
Amica1	147	1.23628	6	18	34.725	2	0.12424	419.487	8.57919	2470.37	1095896	0.16993
Ltb4r1	23	0.76079	6	18	41.081	3	0.12424	450.444	8.79913	1665.87	510688	0.10458
Tm4sf4	289	1.16629	8	18	13.409	1	0.11044	380.233	8.25803	1419.19	437776	0.26144
Serpina3c	39	0.69977	8	18	29.015	1	0.12424	421.237	8.59517	187.198	112016	0.15686
Arl13b	28	0.73175	7	18	4.149	5	0.12424	361.954	8.10963	7670.7	11000000	0.13072
Fh1	23	0.76079	6	18	5.488	1	0.11044	361.825	8.09517	1164.47	278912	0.10458
Adora1	14	0.64826	5	18	27.694	3	0.12424	457.661	8.86001	2594.06	852968	0.06536
Per1	23	0.76079	6	18	18.959	2	0.14199	415.419	8.58528	4348.24	1569072	0.10458
Rerg	9	0.61557	2	18	18.208	1	0.12424	406.601	8.50841	2179.18	597608	0.01307
Prg4	15	0.57059	6	18	28.779	2	0.12424	416.687	8.56016	2890.86	1511568	0.07843
Slc16a10	170	1.1708	7	18	6.826	1	0.12424	368.662	8.17355	997.843	165440	0.20915
Slc7a11	124	1.29653	5	18	9.712	1	0.12424	407.012	8.50841	1839.39	613672	0.14379
Ggt5	11	0.56839	4	18	11.175	4	0.14199	405.702	8.50613	5897.51	1466952	0.03922
Spsb1	11	0.56839	4	18	11.07	4	0.12424	394.713	8.40643	6825.18	3264544	0.05229
Sdsl	49	0.8164	8	18	8.174	2	0.12424	352.624	7.99471	1107.06	455840	0.18301
Slc43a2	266	1.04966	8	16	3.87	1	0.12424	358.855	8.08832	175.858	61104	0.3
Map3k6	18	0.66569	6	16	17.618	2	0.14199	433.069	8.70095	2902.37	781656	0.11667
Parvb	243	1.09763	7	16	35.518	2	0.12424	397.354	8.4148	576.571	191688	0.25
Gm14548	727	1.24398	7	16	47.885	1	0.12424	410.537	8.51146	19.8713	17624	0.28333
Npnt	51	1.16687	5	16	32.14	2	0.12424	408.213	8.48558	379.341	122808	0.15
Zfp281	28	1.13679	4	16	9.842	4	0.12424	414.261	8.58147	3668.9	1272760	0.11667
Il20rb	242	1.33138	6	16	36.515	3	0.12424	452.344	8.83337	2461.58	753600	0.23333
Ktn1	9	0.61795	3	16	9.417	5	0.12424	387.604	8.37142	3752.92	1411968	0.03333
Suv420h1	18	0.66569	6	16	15.929	3	0.12424	412.87	8.56701	1119.08	312256	0.13333
Nmd3	52	0.95098	6	16	2.695	2	0.12424	333.777	7.81967	2944.82	1787992	0.18333
Cux2	146	1.23628	6	16	6.836	1	0.11044	371.633	8.19182	685.418	145336	0.21667
Igfbp5	15	0.77792	5	16	23.584	2	0.14199	425.236	8.66747	2817.82	1110400	0.1
Creb3l4	17	0.77792	5	16	16.189	3	0.14199	435.819	8.7314	2363.01	628304	0.1
Rab27a	9	0.61795	3	16	19.442	4	0.14199	397.721	8.42546	6702.68	4271448	0.05
Kctd13	29	1.13679	4	16	6.961	1	0.14199	367.798	8.16823	1168.37	310208	0.13333
Sun1	22	0.76079	6	16	7.234	3	0.14199	387.421	8.36381	4035.47	1761424	0.13333
Tbc1d8	11	0.92693	3	16	11.61	1	0.14199	402.529	8.47036	2927.25	1040920	0.05
Chst15	36	1.03722	5	16	6.433	4	0.12424	363.788	8.1218	1496.64	732776	0.18333
Xylt1	32	0.85588	6	16	17.891	3	0.12424	388.413	8.34859	3269.95	1844472	0.15
S1pr3	28	0.85588	6	16	31.959	4	0.14199	435.486	8.72607	6472.44	3526808	0.15
Hipk3	8	0.61557	2	16	5.955	4	0.12424	375.555	8.239	7110.16	3812968	0.01667
Eltd1	34	0.85588	6	16	19.722	1	0.12424	393.162	8.39197	274.662	56056	0.15
Chst2	11	0.92693	3	16	9.017	4	0.12424	397.236	8.42698	4556.05	2881616	0.06667
Cd177	170	0.99135	8	16	36.524	1	0.12424	423.511	8.61267	135.242	180584	0.28333
Wfdc17	1446	1.28292	8	16	42.318	1	0.12424	396.07	8.38588	4.37057	1728	0.36667
Gpr84	9	0.61795	3	16	23.688	2	0.12424	406.561	8.49471	580.174	202288	0.06667
Me2	10	0.56839	4	16	10.832	3	0.12424	403.411	8.50461	2882.15	1178648	0.05
Gnl2	52	0.95098	6	16	1.821	1	0.12424	318.108	7.60658	1885.66	598112	0.16667
Dclre1b	29	0.90757	5	16	8.342	2	0.12424	386.535	8.36153	3988.09	1338456	0.11667
Fancc	146	1.23628	6	16	12.512	1	0.12424	393.711	8.42317	899.201	318632	0.21667
Trib1	10	0.61795	3	16	24.134	1	0.12424	429.294	8.68954	1274.95	481248	0.06667
Bin3	12	0.75786	4	16	17.166	1	0.14199	426.986	8.68649	1901.33	533816	0.08333
Arl11	13	0.64826	5	16	24.454	1	0.12424	412.363	8.54266	2006.21	558984	0.08333
Naip6	270	1.10798	8	16	22.819	2	0.12424	389.945	8.3699	74.6054	46776	0.31667
Mknk2	14	0.57059	6	16	20.855	1	0.14199	410.979	8.5556	586.829	159760	0.1
Edil3	51	1.16687	5	16	35.268	5	0.14199	441.036	8.73977	7193.43	2450352	0.16667
Sall1	8	0.61557	2	16	15.404	3	0.14199	404.702	8.49623	3445.31	1182616	0.01667
Cobll1	12	0.75786	4	16	14.58	2	0.12424	410.529	8.54114	3693.49	1127184	0.06667
Rad18	151	1.09763	7	16	9.342	2	0.14199	386.379	8.35468	409.348	101016	0.25
Ahcy	170	0.99135	8	16	7.622	1	0.11044	347.605	7.94981	174.49	71272	0.28333
Slc37a1	8	0.61557	2	16	4.019	3	0.12424	350.373	7.99167	3842.81	1569208	0.01667
Tbc1d30	10	0.56839	4	16	2.838	3	0.12424	345.618	7.94448	4745.27	2374680	0.05
Agpat6	16	0.66569	6	16	11.072	1	0.12424	374.005	8.2352	1911.96	937416	0.11667
Tmem201	16	0.94732	4	16	5.898	3	0.14199	364.564	8.14159	2112.28	1045264	0.1
Slc6a12	9	0.61795	3	16	7.23	2	0.11044	365.367	8.10354	2465.75	590416	0.06667
Bbs4	21	0.90757	5	16	2.72	1	0.12424	338.544	7.87447	1389.5	430328	0.11667
4930438A08Rik	35	0.80493	7	16	9.245	1	0.12424	381.629	8.29228	1800.83	718648	0.18333
Stx11	17	0.66569	6	14	2.44	1	0.12424	339.76	7.89273	327.878	87888	0.15385
Rapgef2	10	0.92693	3	14	13.999	1	0.14199	398.745	8.45362	722.418	169344	0.06593
Susd2	7	0	1	14	7.646	5	0.14199	376.221	8.27021	5827.35	2901512	0
Slc25a28	241	1.33138	6	14	18.575	2	0.12424	396.695	8.41556	2611	1645544	0.30769
Scara5	10	0.92693	3	14	23.062	1	0.14199	417.162	8.6043	365.613	183184	0.06593
Porcn	122	1.29653	5	14	9.125	2	0.12424	372.945	8.23824	706.53	165528	0.21978
Ffar4	9	0.56839	4	14	23.559	4	0.12424	446.594	8.79532	1335.78	346120	0.08791
Mpzl2	8	0.61795	3	14	12.812	4	0.12424	393.17	8.40719	3929	1718264	0.04396
Epc1	726	1.24398	7	14	12.81	4	0.14199	412.993	8.57843	733.201	409200	0.37363
Klhl3	27	1.13679	4	14	5.139	3	0.12424	371.014	8.2078	1504.49	370456	0.13187
Trpm6	10	0.92693	3	14	12.845	3	0.12424	418.754	8.60506	1961.32	564016	0.06593
Fabp7	12	0.75786	4	14	18.978	4	0.12424	427.587	8.68193	857.347	314056	0.13187
Dusp4	24	0.73175	7	14	20.597	4	0.14199	427.636	8.67432	3807.13	2035768	0.21978
Eci3	122	1.29653	5	14	8.497	1	0.12424	380.212	8.27706	492.523	169608	0.21978
Slc16a5	27	1.13679	4	14	4.974	1	0.12424	374.771	8.23215	1679.31	371464	0.13187
Sult2a5	22	0.65858	7	14	4.837	1	0.11044	353.675	8.02135	24.6027	9712	0.1978
Tead1	10	0.51861	5	14	19.09	3	0.12424	423.204	8.63398	3010.15	1155048	0.08791
Sav1	10	0.51861	5	14	11.519	1	0.12424	388.279	8.36914	979.524	302160	0.10989
Ctcfl	8	0.61795	3	14	15.959	3	0.14199	420.119	8.63094	4450.63	1482672	0.06593
Pik3ap1	28	0.90757	5	14	31.619	2	0.12424	423.144	8.62104	1635.03	633504	0.15385
Dpep1	8	0.61795	3	14	15.274	5	0.12424	428.661	8.68421	5153.27	1784632	0.04396
Megf9	8	0.61795	3	14	13.089	5	0.12424	412.204	8.55864	1794.39	490632	0.04396
Jmy	8	0.61795	3	14	11.204	6	0.14199	380.386	8.29075	8421.44	13100000	0.04396
Spdef	7	0.61557	2	14	4.472	4	0.12424	374.796	8.25422	2991.48	1041584	0.02198
Setdb2	16	0.77792	5	14	5.225	2	0.12424	360.425	8.11267	1260.87	439752	0.13187
Cd37	38	0.80493	7	14	42.942	1	0.12424	428.927	8.6492	55.0491	25936	0.24176
Cd300e	168	1.1708	7	14	27.551	1	0.12424	392.48	8.3699	66.2559	48984	0.35165
Dusp8	10	0.51861	5	14	10.332	2	0.14199	384.831	8.32957	1492.15	608072	0.08791
Cdk20	15	0.94732	4	14	12.535	1	0.12424	383.299	8.31282	787.678	221312	0.10989
Ddx28	28	0.90757	5	14	1.797	1	0.12424	320.512	7.6492	2659.36	991584	0.15385
Pim1	15	0.94732	4	14	25.964	4	0.14199	429.152	8.68421	2307.7	1363568	0.10989
Dmpk	7	0	1	14	15.236	4	0.14199	400.186	8.46047	2024.95	1032328	0
Rab40c	10	0.92693	3	14	20.975	2	0.12424	391.429	8.36686	4430.17	2554048	0.06593
Rassf1	8	0.61795	3	14	16.752	2	0.14199	423.352	8.65757	2637.9	726896	0.06593
Slc30a1	7	0.61557	2	14	10.426	1	0.12424	387.212	8.36229	677.888	161096	0.04396
Spink3	8	0.61795	3	14	16.677	1	0.12424	401.404	8.48177	850.402	225360	0.06593
Dcp1b	7	0	1	14	5.543	4	0.12424	361.581	8.11572	7471.43	5215224	0
Barx2	9	0.56839	4	14	15.873	1	0.12424	420.137	8.61039	2091.88	1086608	0.06593
Galnt6	11	0.75786	4	14	3.638	2	0.11044	337.654	7.85392	2868.81	2656616	0.08791
Klf7	17	0.66569	6	14	20.246	2	0.12424	423.787	8.63627	1118.4	245120	0.15385
Nr4a3	32	1.03722	5	14	24.8	1	0.12424	399.662	8.44981	865.311	438152	0.17582
Piezo2	11	0.75786	4	14	7.157	1	0.12424	366.67	8.17203	743.952	178880	0.10989
Asb1	8	0.61795	3	14	4.606	2	0.12424	361.198	8.11724	3143.13	1426472	0.04396
Mafk	127	1.14118	6	14	23.996	1	0.12424	426.027	8.65986	104.969	46680	0.26374
Cttnbp2nl	9	0.56839	4	14	8.917	1	0.12424	377.815	8.26716	1325.4	358000	0.06593
Shisa9	7	0.61557	2	14	3.731	2	0.12424	357.79	8.07919	2666.96	938560	0.02198
Ankrd55	13	0.92693	3	14	12.261	2	0.14199	386.302	8.34783	1598.51	440312	0.13187
Dgki	7	0	1	14	12.385	2	0.14199	403.686	8.49167	2025.88	695032	0
Phc1	13	0.57059	6	14	11.82	1	0.14199	394.362	8.42317	508.167	129432	0.13187
Bbs9	10	0.92693	3	14	8.32	6	0.14199	393.102	8.40491	7440.17	3976464	0.06593
Spata7	7	0.61557	2	14	8.666	1	0.12424	390.935	8.39958	3817.53	1566656	0.02198
a	7	0.61557	2	14	11.031	2	0.12424	386.105	8.35468	1459.93	665208	0.04396
Gpt2	12	0.64826	5	14	4.856	1	0.12424	373.998	8.22987	1120.55	330160	0.10989
Ell2	10	0.92693	3	14	3.985	2	0.12424	343.244	7.93687	3152.24	1581672	0.08791
Camk2d	7	0.61557	2	14	15.207	2	0.12424	407.37	8.51983	1723.27	566464	0.02198
Taok2	9	0.56839	4	14	7.094	2	0.12424	369.396	8.19867	658.899	191320	0.08791
Sorbs3	12	0.64826	5	14	26.141	1	0.14199	401.212	8.45286	231.91	52160	0.10989
Cacnb4	11	0.75786	4	14	5.29	3	0.12424	356.948	8.06396	4274.76	2071176	0.08791
Slc45a3	10	0.51861	5	14	4.127	1	0.12424	366.27	8.18116	720.705	129016	0.08791
Agtrap	840	1.39033	7	14	32.312	1	0.12424	415.544	8.57995	9.34569	8032	0.41758
Slc12a3	7	0.61557	2	14	7.694	2	0.12424	381.045	8.30065	2327.03	846272	0.02198
Slc20a1	7	0.61557	2	14	2.225	1	0.11044	329.162	7.74585	1326.45	208552	0.04396
Acsl4	11	0.75786	4	14	7.198	2	0.12424	375.555	8.2527	1532.79	522664	0.08791
Kcnb1	28	0.90757	5	14	4.148	1	0.12424	349.979	7.99928	1117.64	292208	0.15385
Abcc9	29	0.76079	6	14	11.151	3	0.12424	389.904	8.38132	3720.45	1548008	0.17582
Slc43a1	72	1.14118	6	12	3.628	1	0.12424	362.59	8.14311	74.7589	38888	0.36364
Rap1gap2	6	0.61557	2	12	7.903	2	0.12424	359.846	8.10506	1271.83	383488	0.0303
Micall2	7	0.61795	3	12	7.791	4	0.12424	365.854	8.14692	2301.75	1035808	0.09091
Zfp746	27	0.90757	5	12	6.227	3	0.12424	379.73	8.29913	1384.39	435488	0.21212
Mnt	26	1.13679	4	12	22.527	4	0.12424	430.611	8.70019	1303.62	660312	0.18182
Isyna1	6	0	1	12	2.054	1	0.12424	331.606	7.79075	510.681	93352	0
Lmod3	6	0	1	12	2.318	5	0.12424	305.852	7.46883	10757.1	22700000	0
Pspc1	7	0.61795	3	12	4.545	3	0.12424	356.988	8.08147	5046.41	2881576	0.06061
Grhl3	10	0.75786	4	12	9.154	1	0.14199	387.662	8.37447	186.75	39400	0.12121
Zfp622	26	1.13679	4	12	3.883	7	0.12424	368.106	8.19867	5953.37	2687912	0.18182
Inhbb	32	0.85588	6	12	16.472	1	0.12424	396.502	8.44829	56.8592	24304	0.27273
Sla	9	0.92693	3	12	24.87	2	0.14199	415.595	8.56853	544.126	179584	0.09091
Lrrc25	720	1.42647	6	12	43.374	1	0.12424	412.544	8.52211	0	0	0.45455
Ncoa4	9	0.92693	3	12	13.511	1	0.12424	397.279	8.44981	480.616	135752	0.12121
Pptc7	7	0.61795	3	12	7.609	4	0.12424	384.687	8.34631	2111.88	1043528	0.06061
Nfrkb	27	0.90757	5	12	6.776	2	0.14199	365.521	8.16062	1143.22	345792	0.21212
Erf	10	0.75786	4	12	19.704	2	0.12424	422.327	8.63474	927.751	513592	0.12121
Rab31	8	0.56839	4	12	6.996	4	0.12424	388.544	8.37827	2815.59	1260912	0.09091
Gpr116	26	1.13679	4	12	12.688	1	0.12424	371.995	8.21693	136.574	18392	0.18182
Tsc22d2	6	0.61557	2	12	6.602	5	0.12424	382.286	8.32804	5445.84	2238088	0.06061
Tmprss15	7	0.61795	3	12	10.232	4	0.12424	408.537	8.532	5355.07	2439944	0.06061
Nle1	50	0.95098	6	12	1.78	1	0.12424	300.033	7.38892	508.88	386584	0.30303
Rcl1	49	1.16687	5	12	1.547	1	0.12424	312.392	7.56625	532.859	225056	0.27273
Zc3h6	6	0.61557	2	12	6.324	2	0.12424	382.496	8.325	1218.13	325184	0.0303
Numbl	6	0	1	12	7.424	2	0.14199	374.902	8.2626	2066.85	771912	0
Fmo6	32	0.85588	6	12	7.3	1	0.11044	356.175	8.05331	11.3698	4368	0.27273
Sult1d1	26	0.85588	6	12	5.502	2	0.11044	359.716	8.08375	233.691	236944	0.27273
Crtam	8	0.56839	4	12	24.165	1	0.12424	397.837	8.43535	39.1337	8688	0.09091
Skil	7	0.61795	3	12	9.128	3	0.12424	390.695	8.39882	888.619	196280	0.06061
Gdf10	28	0.76079	6	12	13.23	1	0.12424	389.845	8.39045	34.4535	7480	0.24242
Crebrf	6	0	1	12	5.684	1	0.12424	369.124	8.19562	745.953	149672	0
Rdh12	6	0.61557	2	12	10.306	1	0.12424	386.627	8.35164	1037.99	385416	0.06061
Kif21a	6	0.61557	2	12	5.164	2	0.14199	387.519	8.37371	2176.76	1111296	0.0303
Dsel	26	1.13679	4	12	4.095	1	0.12424	360.321	8.1043	434.813	93368	0.18182
Cry2	24	0.85588	6	12	20.302	1	0.14199	423.302	8.65757	101.819	50048	0.27273
Spata6	8	0.56839	4	12	2.466	2	0.11044	324.036	7.71008	2959.11	1829632	0.09091
Specc1	6	0.61557	2	12	6.831	2	0.12424	373.913	8.24281	3595.24	1464856	0.06061
Myo16	6	0.61557	2	12	2.993	2	0.12424	354.623	8.05712	1504.95	274176	0.0303
Lpin2	7	0.61795	3	12	9.051	2	0.12424	376.72	8.25803	885.583	338928	0.09091
Dgke	6	0.61557	2	12	9.313	1	0.12424	382.304	8.31206	1603.34	808128	0.0303
Cd300lh	121	1.29653	5	12	12.504	2	0.12424	368.98	8.17964	855.009	374056	0.30303
Ms4a4a	144	1.23628	6	12	32.872	1	0.12424	400.535	8.43992	10.7009	13264	0.39394
Trps1	8	0.56839	4	12	24.012	3	0.12424	433.394	8.71389	1294.72	391984	0.09091
Bst1	7	0.61795	3	12	14.98	2	0.12424	387.045	8.35392	2760.87	1362584	0.06061
Chrdl2	31	1.03722	5	12	13.858	2	0.12424	388.577	8.38512	2030.44	713768	0.24242
Tgfbr3	20	0.76079	6	12	19.564	1	0.12424	397.519	8.44981	42.2938	16344	0.24242
Kif21b	6	0.61557	2	12	2.565	2	0.14199	352.029	8.03428	3158.44	2024864	0.0303
Cdo1	10	0.75786	4	12	9.228	1	0.12424	385.263	8.3425	657.231	200696	0.12121
Bmper	14	0.94732	4	12	13.227	1	0.12424	392.744	8.42394	793.416	269472	0.15152
Ovol1	9	0.92693	3	12	7.812	1	0.14199	377.748	8.27858	606.702	145376	0.09091
St3gal5	10	0.75786	4	12	2.005	3	0.11044	314.37	7.56853	1846.04	1538664	0.12121
Wipi1	144	1.23628	6	12	10.319	1	0.12424	369.855	8.20628	18.9164	7792	0.39394
Slc25a15	26	1.13679	4	12	5.595	5	0.11044	344.142	7.91556	7783.22	14300000	0.18182
Trpc4	9	0.51861	5	12	4.222	1	0.12424	364.604	8.16366	592.757	144936	0.12121
Mlxip	6	0	1	12	6.49	1	0.12424	368.681	8.20247	624.81	189752	0
Frmd4b	6	0.61557	2	12	3.311	2	0.14199	338.167	7.87066	2003.91	557200	0.0303
Arl4a	6	0.61557	2	12	3	2	0.14199	351.157	8.01526	4462	2155816	0.06061
Rnf149	9	0.92693	3	12	4.377	2	0.12424	366.348	8.17584	1316.12	470240	0.09091
Tbx2	6	0	1	12	14.965	1	0.12424	402.327	8.48254	774.442	226920	0
Atp1a1	10	0.75786	4	12	5.778	1	0.12424	372.03	8.2253	488.517	133496	0.12121
Aqp1	6	0	1	12	8.465	5	0.12424	387.37	8.34707	5821.63	4325112	0
Miox	6	0.61557	2	12	7.382	2	0.12424	369.729	8.18116	1883.82	651968	0.0303
Gem	6	0.61557	2	12	20.33	3	0.14199	410.869	8.53961	3277.38	1343392	0.0303
Syn2	14	0.94732	4	12	4.429	1	0.12424	339.833	7.89121	671.129	207648	0.15152
Bmf	122	1.04608	6	12	20.623	1	0.12424	391.62	8.40263	6.55828	3008	0.33333
Ppp4r4	6	0.61557	2	12	5.817	1	0.12424	369.63	8.20856	1878.33	522944	0.0303
Gldn	6	0.61557	2	12	5.156	2	0.12424	370.696	8.21922	1226.91	421392	0.0303
Anapc16	10	0.75786	4	12	12.468	3	0.14199	399.238	8.46351	525.486	193048	0.12121
Lnx2	6	0	1	12	6.915	1	0.14199	378.329	8.29304	890.711	173688	0
Gm4794	121	1.29653	5	12	11.409	1	0.11044	373.283	8.2253	870.773	289672	0.30303
Gm4737	122	1.04608	6	12	5.13	1	0.11044	344.65	7.92469	91.8626	41648	0.33333
Cds1	7	0.61795	3	12	6.105	1	0.12424	353.507	8.04266	510.116	86584	0.06061
Siah1a	6	0	1	12	2.094	2	0.12424	328.667	7.76564	3062.39	2951768	0
Ell	10	0.75786	4	12	13.266	2	0.12424	401.194	8.47416	1018.5	403000	0.12121
Aff1	14	0.94732	4	12	7.501	1	0.12424	378.781	8.28771	1021.62	437528	0.18182
Adra2a	9	0.92693	3	12	19.472	1	0.12424	412.387	8.55179	217.724	81744	0.09091
Spock2	9	0.92693	3	12	19.772	1	0.14199	406.102	8.51222	244.708	85840	0.09091
Fibin	6	0	1	12	4.767	4	0.12424	347.296	7.98558	5906.96	3243496	0
Cdh4	7	0.61795	3	12	15.547	1	0.12424	408.32	8.532	197.901	97944	0.06061
Etnppl	6	0.61557	2	12	4.478	1	0.12424	375.154	8.2527	1396.9	342560	0.0303
Vipr1	6	0.61557	2	12	7.983	1	0.12424	365.795	8.16823	2015.09	884456	0.06061
Sfxn3	6	0.61557	2	12	2.267	2	0.12424	336.458	7.84174	1943.64	538432	0.0303
Syt4	9	0.92693	3	12	1.947	1	0.12424	328.679	7.76488	813.052	178032	0.09091
Ust	26	1.13679	4	12	5.769	2	0.12424	362.805	8.13017	2848.41	1409160	0.18182
Syt12	9	0.92693	3	12	7.083	2	0.12424	375.437	8.23672	1471.82	474528	0.09091
Cerk	9	0.92693	3	12	3.16	3	0.12424	332.386	7.8151	5336.23	3226320	0.09091
Rsph1	7	0.61795	3	12	14.704	1	0.12424	415.42	8.58223	4416.1	1883648	0.09091
Col22a1	6	0.61557	2	12	15.421	1	0.12424	389.512	8.38436	230.224	56120	0.06061
Kcnd3	28	0.76079	6	12	4.349	2	0.12424	344.773	7.95894	704.387	258520	0.24242
Abcc4	6	0.61557	2	12	9.072	1	0.12424	402.912	8.49243	1541.36	453648	0.0303
Abcc1	6	0	1	12	17.779	2	0.12424	412.829	8.55103	2085.4	711528	0
Nlrp12	120	1.29653	5	10	9.254	1	0.12424	354.881	8.05255	0	0	0.44444
2022-03-07	6	0.61795	3	10	9.766	8	0.12424	376.937	8.26944	7651.26	5195072	0.08889
Tbc1d15	5	0.61557	2	10	5.254	2	0.12424	374.189	8.2626	3368.57	1219704	0.04444
Pglyrp1	8	0.92693	3	10	23.164	1	0.12424	394.669	8.41556	17.5326	13272	0.13333
Ip6k2	5	0.61557	2	10	7.193	5	0.12424	380.738	8.28999	7129.46	4819336	0.04444
Pyhin1	8	0.92693	3	10	16.229	1	0.12424	385.988	8.325	56.0317	12400	0.17778
Stk33	5	0	1	10	6.503	4	0.12424	355.14	8.06549	4132.48	2245168	0
Slc36a4	5	0.61557	2	10	5.869	3	0.11044	364.975	8.16062	458.174	130648	0.04444
Zfp655	5	0.61557	2	10	5.78	2	0.12424	348.068	7.98253	998.492	513752	0.04444
Rgs4	26	0.90757	5	10	17.699	1	0.12424	398.461	8.45133	29.0179	13832	0.31111
Enc1	25	1.13679	4	10	3.26	1	0.12424	353.356	8.04189	472.282	90736	0.26667
Emb	5	0.61557	2	10	7.184	4	0.12424	379.838	8.29608	3094.46	1321336	0.04444
Elk1	8	0.92693	3	10	22.315	3	0.14199	425.095	8.66214	278.802	92808	0.13333
Tmem47	5	0.61557	2	10	3.474	2	0.12424	348.506	8.00308	2793.14	1255944	0.04444
Fbxo31	5	0.61557	2	10	8.186	1	0.12424	386.944	8.37675	400.021	137992	0.04444
Ppip5k2	5	0.61557	2	10	1.851	5	0.12424	327.394	7.7527	3787.22	1875496	0.04444
Fmo2	48	1.16687	5	10	4.328	1	0.11044	328.979	7.72911	3.56144	1816	0.4
Sybu	25	1.13679	4	10	3.321	1	0.12424	328.01	7.72454	494.126	150336	0.26667
Emp3	6	0.61795	3	10	15.892	2	0.12424	414.72	8.56473	1419.95	592192	0.08889
Zfp568	26	0.90757	5	10	3.189	1	0.12424	336.007	7.87523	27.9238	9400	0.31111
Mmrn1	5	0.61557	2	10	11.18	2	0.12424	390.82	8.38588	2008.9	732472	0.04444
Rassf2	5	0.61557	2	10	2.459	1	0.12424	343.498	7.95437	1238.23	446112	0.08889
Mt2	7	0.56839	4	10	10.441	1	0.12424	397.029	8.44829	111.126	25784	0.13333
Cobl	6	0.61795	3	10	11.002	2	0.16565	383.95	8.35088	2246.44	1281328	0.08889
Pdp1	6	0.61795	3	10	5.461	1	0.12424	376.661	8.28771	549.734	176064	0.08889
Klf3	5	0	1	10	11.253	2	0.12424	379.755	8.29684	412.723	111888	0
Foxp1	10	0.64826	5	10	25.314	1	0.14199	431.252	8.70248	78.8605	41048	0.22222
Wdr96	7	0.56839	4	10	1.381	3	0.11044	302.027	7.42926	3234.39	2942936	0.13333
Sema6d	5	0.61557	2	10	20.55	2	0.14199	418.719	8.59745	887.602	276200	0.04444
Celsr3	6	0.61795	3	10	4.416	1	0.12424	352.62	8.05103	542.642	184784	0.08889
Folh1	5	0.61557	2	10	7.264	1	0.14199	378.929	8.30217	837.528	217648	0.08889
Limk2	5	0.61557	2	10	14.89	1	0.12424	404.161	8.4871	141.989	43560	0.04444
Nedd1	5	0.61557	2	10	2.57	1	0.12424	323.908	7.7116	400.726	82216	0.04444
Rsph4a	6	0.61795	3	10	3.137	1	0.12424	338.174	7.89045	1486.4	738640	0.08889
Ccnl1	8	0.92693	3	10	4.977	1	0.12424	352.485	8.02667	284.586	51416	0.13333
Ccdc68	25	1.13679	4	10	1.257	1	0.12424	302.576	7.43154	421.452	77680	0.26667
Kdm3a	5	0.61557	2	10	9.697	1	0.12424	383.038	8.33489	848.048	506296	0.04444
Dnah2	5	0	1	10	1.239	2	0.14199	302.748	7.42165	3502.32	2560080	0
Trib2	6	0.61795	3	10	6.675	1	0.12424	371.488	8.23215	347.505	80128	0.08889
C9orf72	5	0	1	10	7.073	3	0.12424	377.561	8.27629	3473.13	1408800	0
Ifitm2	5	0.61557	2	10	8.267	1	0.12424	361.305	8.10658	383.517	136024	0.04444
Stc1	5	0.61557	2	10	4.588	1	0.12424	362.779	8.15986	615.084	233928	0.04444
Mcemp1	5	0.61557	2	10	17.072	2	0.12424	378.504	8.2527	2623.21	2144784	0.08889
Bbc3	120	1.29653	5	10	21.767	1	0.12424	386.889	8.36381	0	0	0.44444
Lrtm2	5	0	1	10	3.252	2	0.12424	343.289	7.9422	2890	1557904	0
Baiap2	6	0.61795	3	10	4.262	2	0.14199	353.664	8.05255	755.525	271088	0.08889
Orai2	7	0.56839	4	10	3.561	1	0.12424	344.732	7.96503	284.991	70504	0.13333
Atp1b1	6	0.61795	3	10	13.393	1	0.12424	389.504	8.37751	183.555	62616	0.13333
Cdip1	5	0.61557	2	10	2.346	1	0.12424	344.523	7.96046	865.586	166056	0.04444
Fam134b	5	0.61557	2	10	6.434	1	0.12424	372.571	8.24281	2334.95	1101480	0.04444
Atg2a	120	1.29653	5	10	5.914	1	0.12424	364.631	8.1629	0	0	0.44444
Atg16l2	120	1.29653	5	10	8.778	1	0.12424	364.631	8.1629	0	0	0.44444
Gin1	5	0.61557	2	10	1.405	2	0.12424	300.806	7.40262	2975.49	2405016	0.04444
As3mt	5	0	1	10	4.728	3	0.12424	362.763	8.1218	2488.94	885632	0
Tbc1d2	5	0.61557	2	10	1.888	2	0.14199	332.857	7.81206	3516.25	1836424	0.04444
Fgl1	5	0	1	10	11.416	2	0.12424	383.645	8.31435	2027.69	1138480	0
Apba1	5	0.61557	2	10	2.068	2	0.12424	336.006	7.85696	2919.08	1309976	0.04444
Hist1h1c	9	0.75786	4	10	9.408	4	0.12424	395.354	8.4422	3325.45	1780160	0.17778
Sat1	9	0.75786	4	10	17.174	3	0.12424	395.646	8.39121	3138.61	2482432	0.17778
Klhl25	25	1.13679	4	10	2.135	1	0.12424	326.885	7.75422	182.442	30336	0.26667
Fam13a	8	0.92693	3	10	11.802	1	0.12424	402.487	8.50613	590.808	157912	0.13333
Ankrd44	5	0	1	10	3.879	1	0.12424	335.842	7.85772	1206.66	481904	0
Sptbn5	5	0.61557	2	10	12.271	1	0.12424	396.661	8.46275	592.729	172144	0.08889
Napsa	5	0.61557	2	10	7.918	2	0.12424	381.352	8.32424	2696.33	979768	0.04444
Cldn15	5	0.61557	2	10	6.243	2	0.12424	358.579	8.08832	2780.22	1770216	0.04444
Omd	5	0	1	10	15.51	1	0.12424	400.645	8.44905	2500.14	1245968	0
Aff4	13	0.94732	4	10	3.239	1	0.12424	334.019	7.84174	360.772	114344	0.22222
Akap12	8	0.92693	3	10	8.135	1	0.12424	372.104	8.2352	311.763	59672	0.13333
Col13a1	7	0.56839	4	10	7.47	1	0.12424	373.071	8.23976	324.782	63656	0.13333
Ccdc15	5	0	1	10	7.122	1	0.11044	361.275	8.11495	521.813	90288	0
Acss3	5	0.61557	2	10	9.846	1	0.12424	396.137	8.45209	3408.03	1143480	0.04444
Acmsd	5	0	1	10	4.294	1	0.12424	365.355	8.15757	820.944	144192	0
Ackr3	120	1.29653	5	10	29.307	1	0.12424	406.661	8.50917	0	0	0.44444
B4galt6	5	0	1	10	2.693	3	0.11044	333.762	7.82348	4004.94	2754832	0
Acer2	8	0.92693	3	10	1.211	2	0.11044	285.55	7.17431	403.504	104312	0.13333
Asic3	6	0.61795	3	10	8.533	2	0.12424	365.023	8.14311	2798.15	1780592	0.08889
Kcnn2	25	1.13679	4	10	2.095	1	0.11044	315.185	7.61115	139.695	24480	0.26667
Soat1	5	0.61557	2	10	5.059	1	0.12424	364.679	8.1629	311.881	56360	0.04444
Insig2	5	0	1	10	6.552	2	0.12424	365.129	8.16442	2831.24	1554336	0
Itpkc	5	0.61557	2	10	9.872	2	0.14199	378.545	8.28086	1851.84	761512	0.04444
Tpcn2	5	0	1	10	6.22	2	0.12424	368.205	8.18877	3649.07	1996112	0
Slc25a33	4	0.61557	2	8	1.612	2	0.12424	316.281	7.61495	1198.92	439160	0.07143
Tmem62	4	0.61557	2	8	3.513	1	0.12424	344.99	7.96807	295.397	49144	0.07143
Sdpr	4	0.61557	2	8	6.228	4	0.14199	384.279	8.33642	4276.45	2020840	0.07143
Ngp	4	0.61557	2	8	7.145	2	0.11044	345.51	7.95666	4579.45	5792712	0.07143
Qsox1	4	0.61557	2	8	10.502	2	0.12424	388.42	8.38741	416.106	92744	0.07143
Inpp4a	5	0.61795	3	8	11.728	2	0.14199	372.845	8.22987	662.054	235072	0.14286
Stk17b	4	0.61557	2	8	1.967	2	0.12424	306.043	7.49851	2749.53	1646952	0.07143
Hectd2	4	0.61557	2	8	11.917	2	0.12424	417.061	8.62333	354.548	124840	0.07143
Heca	6	0.56839	4	8	26.252	1	0.12424	391.687	8.38969	0.82902	456	0.21429
Slc35g2	4	0	1	8	1.6	2	0.12424	344.489	7.97645	499.625	179632	0
Tmem156	4	0	1	8	2.861	1	0.12424	337.496	7.8973	274.605	58160	0
Gprc5b	4	0	1	8	2.446	1	0.12424	342.731	7.94372	212.149	67632	0
Gde1	4	0.61557	2	8	5.897	1	0.14199	370.971	8.21769	190.494	54600	0.07143
Galnt15	4	0.61557	2	8	7.491	1	0.12424	373.546	8.25042	1533.58	619016	0.07143
Hspb7	4	0	1	8	2.368	2	0.12424	331.319	7.81434	4502.91	3933600	0
Plac8	4	0	1	8	4.95	2	0.12424	344.865	7.93687	3622.98	2948528	0
Klf9	4	0	1	8	9.592	1	0.12424	391.144	8.411	107.586	31248	0
Gpr35	4	0.61557	2	8	4.757	1	0.14199	372.605	8.25118	81.1133	15384	0.07143
Ifitm6	4	0.61557	2	8	15.67	2	0.12424	370.424	8.17812	424.053	164000	0.14286
Lzts1	4	0.61557	2	8	2.019	3	0.11044	309.108	7.52211	1977.09	1227736	0.07143
Sash1	4	0.61557	2	8	1.584	1	0.12424	299.915	7.40414	1347.14	676488	0.07143
Fam19a2	4	0	1	8	1.428	2	0.11044	284.687	7.15833	2966.32	3741968	0
Tmem26	6	0.56839	4	8	6.595	1	0.12424	381.187	8.32424	89.7486	19208	0.21429
Patz1	7	0.92693	3	8	13.397	1	0.12424	380.03	8.31054	154.164	46392	0.21429
Zfp592	4	0	1	8	7.221	2	0.14199	381.126	8.33337	775.264	170336	0
Lrrc32	4	0.61557	2	8	6.202	1	0.12424	351.331	8.01906	175.123	33336	0.07143
Txndc11	4	0	1	8	3.656	2	0.11044	345.609	7.97645	1033.5	414048	0
Pcdh17	4	0.61557	2	8	4.939	1	0.12424	352.662	8.05027	227.55	42888	0.07143
Slc16a9	4	0.61557	2	8	2.365	1	0.11044	324.707	7.71389	234.13	33784	0.07143
Eif2b3	4	0.61557	2	8	2.268	1	0.12424	326.336	7.75955	385.869	80216	0.07143
Zbtb21	5	0.61795	3	8	9.095	1	0.12424	387.054	8.35849	184.991	40480	0.14286
Phf13	4	0.61557	2	8	3.838	1	0.14199	356.598	8.09669	1353.06	418376	0.07143
Plekhm3	4	0	1	8	3.646	1	0.12424	347.767	7.99928	196.945	43632	0
Stxbp3a	5	0.61795	3	8	6.42	4	0.12424	374.371	8.26868	1800.67	845104	0.14286
Doc2b	4	0	1	8	1.661	2	0.12424	315.567	7.62104	2647.68	2164512	0
Pdk3	5	0.61795	3	8	5.076	1	0.12424	371.177	8.24661	434.225	136992	0.14286
Ipmk	5	0.61795	3	8	3.614	1	0.14199	354.333	8.0594	354.891	104656	0.14286
Trmt61a	4	0.61557	2	8	1.19	1	0.11044	268.828	6.88131	321.301	49528	0.07143
Dcaf6	4	0.61557	2	8	2.803	2	0.12424	334.052	7.84326	2760.77	1898904	0.07143
Smoc2	4	0	1	8	8.285	3	0.12424	385.512	8.3562	2966.76	1231440	0
Cyp2c69	7	0.92693	3	8	3.888	1	0.11044	317.084	7.60049	0.65	40	0.21429
Slc22a21	4	0.61557	2	8	10.893	2	0.12424	389.629	8.37751	1142.68	436136	0.07143
Zswim4	4	0	1	8	1.377	3	0.11044	291.476	7.28162	3001.13	2970032	0
Ctdsp2	4	0	1	8	5.545	4	0.12424	365.431	8.16747	4789.13	3989040	0
Tiparp	4	0.61557	2	8	4.524	1	0.12424	364.304	8.15833	451.24	191080	0.07143
Nrbp2	4	0	1	8	3.279	1	0.12424	340.846	7.92622	572.601	106688	0
Foxf1	5	0.61795	3	8	13.018	1	0.12424	411.187	8.57006	324.649	238144	0.14286
Ncdn	4	0	1	8	1.624	2	0.14199	311.343	7.56016	2930.77	1837024	0
Cirbp	4	0	1	8	8.312	4	0.12424	380.004	8.31359	7945.59	8034160	0
Sulf2	4	0.61557	2	8	6.173	2	0.12424	375.663	8.25955	1092.64	414808	0.07143
Chil1	12	0.94732	4	8	26.64	1	0.12424	441.777	8.76184	2.12799	1176	0.35714
Sh3pxd2b	4	0.61557	2	8	14.557	3	0.14199	393.629	8.43079	2781.18	1194488	0.07143
Zfx	5	0.61795	3	8	11.242	1	0.14199	414.452	8.59669	158.255	57328	0.14286
Olig1	5	0.61795	3	8	7.658	2	0.12424	368.488	8.21313	2535.64	1636192	0.14286
Zfp113	4	0	1	8	4.694	1	0.12424	358.746	8.08756	934.411	187504	0
Trim3	4	0	1	8	4.203	3	0.12424	377.913	8.29532	3833.43	2264048	0
Gtf2a2	4	0.61557	2	8	7.976	2	0.14199	385.155	8.35544	2728.72	1151400	0.07143
Dock10	5	0.61795	3	8	16.072	1	0.14199	387.829	8.36153	540.555	132048	0.14286
Rubcnl	5	0.61795	3	8	1.941	1	0.11044	332.475	7.8113	394.124	81232	0.14286
Rdh13	4	0.61557	2	8	1.405	1	0.12424	323.469	7.70932	793.847	202408	0.07143
Ccdc120	24	1.13679	4	8	1.421	1	0.12424	298.352	7.37903	0	0	0.42857
Rasa3	4	0	1	8	6.914	1	0.14199	367.381	8.18649	1047.66	431168	0
Trim62	4	0	1	8	7.254	1	0.12424	356.157	8.06625	427.782	150544	0
Mark1	4	0	1	8	8.07	1	0.12424	367.846	8.19258	297.598	81312	0
Cd55	7	0.92693	3	8	14.664	1	0.12424	391.038	8.36534	225.536	78056	0.21429
Bnip5	4	0	1	8	1.832	2	0.12424	317.44	7.64007	3227.81	1643744	0
Egln2	7	0.92693	3	8	10.482	1	0.12424	378.171	8.29456	1152.68	867400	0.21429
Zfp112	4	0	1	8	1.869	1	0.12424	331.018	7.8113	753.527	188640	0
Trp53bp2	4	0	1	8	10.54	1	0.14199	382.112	8.3387	508.134	661200	0
Topors	4	0	1	8	6.951	2	0.14199	374.279	8.25651	1281.83	449888	0
Ofd1	4	0	1	8	8.604	3	0.12424	369.927	8.20856	3602.73	1521216	0
Atp6v0a4	4	0	1	8	7.446	3	0.12424	383.269	8.3425	2172.47	948096	0
Trp53inp1	4	0	1	8	9.279	2	0.12424	384.729	8.3524	1268.1	612800	0
Tnfrsf11a	12	0.94732	4	8	21.928	1	0.12424	439.952	8.7489	2.9615	1992	0.35714
Nynrin	4	0.61557	2	8	1.585	2	0.12424	321.594	7.70095	425.181	140408	0.07143
Asprv1	5	0.61795	3	8	7.338	4	0.12424	371.555	8.21084	6662.19	4391664	0.14286
Wsb1	4	0.61557	2	8	2.113	1	0.11044	317.586	7.61952	490.344	72040	0.07143
Wbp1l	4	0	1	8	1.395	1	0.12424	302.893	7.446	753.831	145792	0
Grasp	4	0.61557	2	8	2.058	1	0.14199	311.81	7.57005	650.426	177896	0.07143
Dync1li1	4	0	1	8	1.406	4	0.12424	300.98	7.39958	8201.12	15500000	0
Arid5a	4	0.61557	2	8	5.906	2	0.12424	349.467	8.00613	678.653	428584	0.07143
Arid3a	4	0	1	8	17.597	1	0.12424	392.146	8.39654	16.1382	4656	0
Arhgef37	4	0.61557	2	8	9.035	2	0.12424	378.713	8.27477	2504.18	1511144	0.07143
Rcsd1	4	0.61557	2	8	8.42	2	0.14199	376.055	8.26792	1804.95	674664	0.07143
Ncoa7	4	0	1	8	10.637	2	0.12424	387.546	8.36305	585.212	156432	0
Ap1s2	4	0	1	8	13.834	1	0.12424	389.495	8.38132	49.9896	15280	0
Gpr56	4	0.61557	2	8	9.735	4	0.12424	374.313	8.24585	5434.44	5031688	0.07143
Clca1	4	0.61557	2	8	3.409	1	0.12424	345.674	7.97873	375.534	92728	0.07143
Rcan2	4	0.61557	2	8	3.993	2	0.14199	365.095	8.18421	887.538	308536	0.07143
Fndc3b	7	0.92693	3	8	2.986	1	0.12424	336.48	7.87523	117.412	20120	0.21429
Hspbap1	5	0.61795	3	8	8.688	2	0.12424	375.321	8.27858	620.017	325680	0.14286
Nnmt	4	0.61557	2	8	7.943	1	0.12424	373.712	8.24585	269.74	72840	0.07143
Dhtkd1	4	0.61557	2	8	4.559	1	0.12424	346.44	7.96275	574.38	132920	0.07143
Avpr1a	4	0.61557	2	8	17.166	1	0.12424	401.777	8.49395	141.866	38504	0.07143
Greb1	4	0.61557	2	8	10.568	1	0.12424	380.355	8.30978	88.6956	16216	0.07143
Fez1	4	0	1	8	2.359	1	0.14199	334.767	7.83565	835.622	221232	0
Zfp608	4	0.61557	2	8	5.959	1	0.14199	374.448	8.26412	425.602	104216	0.07143
Ramp3	5	0.61795	3	8	4.626	1	0.12424	355.849	8.07919	273.139	55232	0.14286
Mmp28	8	0.75786	4	8	14.952	1	0.12424	384.829	8.32881	4.75099	2592	0.28571
Zdbf2	4	0	1	8	1.417	3	0.11044	285.081	7.17659	3281.17	3492000	0
Adam23	4	0	1	8	7.554	4	0.12424	353.395	8.04113	5161.35	4517088	0
Acnat2	4	0	1	8	2.097	1	0.12424	344.324	7.94372	390.165	71280	0
Cers4	7	0.92693	3	8	2.063	1	0.11044	292.419	7.2976	383.949	280472	0.21429
Gramd1b	4	0	1	8	1.911	2	0.12424	322.24	7.68877	506.125	117568	0
Kcnj8	24	1.13679	4	8	1.446	1	0.11044	305.178	7.49014	0	0	0.42857
Slc22a3	4	0	1	8	2.594	3	0.12424	353.432	8.06168	2863.23	1185136	0
Abca6	4	0	1	8	4.034	1	0.12424	360.758	8.13017	221.819	35600	0
Abcd4	4	0.61557	2	8	1.841	1	0.11044	317.532	7.62408	247.211	32568	0.07143
Abca13	4	0	1	8	6.057	1	0.12424	359.24	8.11267	922.014	343072	0
Sra1	5	0.61795	3	8	7.716	1	0.14199	374.819	8.26868	207.43	79648	0.14286
Srrd	4	0	1	8	2.239	2	0.11044	338.578	7.88208	4233.08	1865376	0
Fam222a	4	0.61557	2	8	2.089	3	0.12424	323.602	7.71389	2009.09	1252552	0.07143
Syne4	6	0.92693	3	6	1.801	1	0.12424	309.683	7.55255	0	0	0.4
Pcif1	3	0.61557	2	6	1.802	2	0.11044	300.635	7.42089	829.675	638176	0.13333
Trpm2	3	0	1	6	2.851	1	0.12424	326.196	7.75498	134.327	23864	0
Zfp516	3	0.61557	2	6	6.381	1	0.14199	385.762	8.37142	53.0008	13872	0.13333
Ptprm	3	0	1	6	7.162	1	0.12424	351.648	8.02059	172.718	47608	0
St5	3	0	1	6	1.357	1	0.11044	305.491	7.48558	279.992	41592	0
Tmem87b	3	0.61557	2	6	7.198	1	0.12424	363.112	8.16138	43.2371	10624	0.13333
Slc37a4	3	0	1	6	5.094	2	0.12424	359.662	8.11724	561.979	263112	0
Mfng	3	0.61557	2	6	3.193	1	0.11044	333.121	7.8425	84.5275	13472	0.13333
Lemd2	6	0.92693	3	6	1.729	1	0.12424	316.598	7.64083	0	0	0.4
Slc25a36	3	0	1	6	5.989	2	0.12424	357.323	8.07234	573.435	203368	0
Tgif1	4	0.61795	3	6	9.603	2	0.12424	418.004	8.61191	74.3125	27000	0.26667
Il18rap	3	0	1	6	18.22	1	0.14199	378.271	8.27173	8.26582	2936	0
Rbm3	4	0.61795	3	6	2.668	2	0.12424	323.769	7.73367	493.5	380184	0.26667
Mt1	4	0.61795	3	6	8.678	1	0.12424	388.279	8.39045	33.7251	14600	0.26667
Hecw2	3	0	1	6	1.565	3	0.11044	317.359	7.65072	1282.97	514296	0
Nt5dc3	3	0	1	6	4.107	3	0.12424	343.431	7.94905	5265.08	4774376	0
Gp1bb	6	0.92693	3	6	21.455	1	0.12424	393.987	8.40871	0	0	0.4
Peg3	3	0	1	6	4.084	1	0.12424	358.787	8.12104	883.594	327448	0
Gpr55	3	0.61557	2	6	6.232	2	0.12424	358.035	8.08451	470.942	268000	0.13333
Piwil2	3	0.61557	2	6	3.405	2	0.12424	351.523	8.05331	262.237	129440	0.13333
Galnt18	3	0.61557	2	6	7.167	1	0.12424	372.296	8.24433	98.3408	37104	0.13333
Rapgef5	3	0	1	6	2.005	1	0.11044	308.686	7.53428	180.495	45560	0
Mybpc1	3	0	1	6	2.79	1	0.12424	336.582	7.89045	2124.81	4563288	0
Lrrc8b	3	0	1	6	1.16	3	0.12424	295.279	7.34402	645.264	332088	0
Fam180a	3	0	1	6	3.282	1	0.11044	317.652	7.6355	574.139	196184	0
Eurl	3	0	1	6	1.964	2	0.11044	318.792	7.67051	2645.83	1861976	0
Erp27	3	0	1	6	1.306	2	0.12424	300.63	7.41936	338.852	111224	0
Klf11	3	0	1	6	4.24	1	0.12424	334.643	7.86077	29.9119	8504	0
Enkur	3	0	1	6	2.575	2	0.12424	323.438	7.73063	837.331	367448	0
Nfkbil1	3	0.61557	2	6	1.559	1	0.12424	307.344	7.52134	136.446	16752	0.13333
Nrg4	6	0.92693	3	6	16.855	1	0.12424	407.604	8.53276	0	0	0.4
Ntn4	4	0.61795	3	6	12.052	1	0.12424	403.154	8.5008	12.2453	11768	0.26667
Fam117b	3	0	1	6	2.265	1	0.12424	326.388	7.75955	796.223	313480	0
Dpep2	3	0.61557	2	6	2.211	1	0.12424	334.186	7.86305	136.764	23952	0.13333
Dpep3	4	0.61795	3	6	2.165	1	0.12424	326.152	7.77325	22.6594	5832	0.26667
Ppp1r3g	3	0.61557	2	6	3.328	3	0.12424	337.868	7.90186	1621.22	1214400	0.13333
Tppp3	3	0	1	6	1.512	1	0.12424	306.686	7.51373	719.456	376280	0
Dirc2	3	0.61557	2	6	7.143	1	0.12424	375.755	8.28619	37.8528	4048	0.13333
Maml3	3	0.61557	2	6	3.381	1	0.11044	333.078	7.84479	178.085	53520	0.13333
Nudt4	3	0	1	6	1.336	2	0.11044	304.994	7.47035	2719.16	2751320	0
Dcaf15	3	0.61557	2	6	1.766	1	0.12424	296.088	7.34935	437.863	131376	0.13333
D1Ertd622e	3	0	1	6	1.58	1	0.12424	311.024	7.56396	801.511	261912	0
Slc22a27	3	0.61557	2	6	2.748	1	0.11044	314.544	7.56092	4.96166	2096	0.13333
Ctsj	6	0.92693	3	6	20.419	1	0.12424	412.404	8.55636	0	0	0.4
Ms4a3	3	0.61557	2	6	10.077	1	0.12424	358.862	8.10278	27.0763	11488	0.13333
Cpsf4l	3	0	1	6	1.15	1	0.11044	313.786	7.6043	132.973	26648	0
Urad	3	0	1	6	2.329	2	0.11044	335.713	7.84707	1496.29	447928	0
Sez6l2	4	0.61795	3	6	4.977	1	0.12424	343.308	7.93002	31.3143	7640	0.26667
Spire1	3	0.61557	2	6	2.044	1	0.14199	312.538	7.58984	90.5501	15584	0.13333
Gjc1	3	0.61557	2	6	2.115	2	0.11044	314.234	7.61039	2610	2455840	0.13333
Clip3	3	0	1	6	2.854	1	0.14199	344.107	7.96807	1399.62	1043288	0
Dst	3	0	1	6	1.611	1	0.14199	313.588	7.6043	523.807	188616	0
Idua	3	0	1	6	5.891	3	0.12424	368.895	8.21161	1646.74	586872	0
Cldn14	3	0.61557	2	6	3.46	1	0.12424	337.367	7.86533	88.0418	8096	0.13333
Clcf1	6	0.92693	3	6	14.017	1	0.12424	431.286	8.6903	0	0	0.4
Hdgfrp3	3	0	1	6	1.389	1	0.11044	297.034	7.38131	141.646	33080	0
Pcf11	3	0	1	6	2.924	2	0.12424	337.906	7.89501	299.6	76872	0
Ifitm10	3	0.61557	2	6	3.559	1	0.12424	338.235	7.89425	210.733	29408	0.13333
Cfap69	4	0.61795	3	6	1.385	1	0.09939	260.175	6.7527	165.153	102712	0.26667
Ear2	3	0.61557	2	6	14.327	1	0.12424	367.288	8.16975	28.9333	16160	0.13333
Sh2d4b	3	0	1	6	2.008	1	0.12424	344.236	7.9696	81.5993	18136	0
Cables1	3	0	1	6	9.292	1	0.14199	367.271	8.20095	133.557	38680	0
Sik1	3	0	1	6	3.179	1	0.12424	336.526	7.87827	43.5058	15944	0
Btg3	3	0.61557	2	6	3.98	1	0.12424	360.054	8.13398	184.672	48560	0.13333
Brpf3	3	0.61557	2	6	12.304	1	0.14199	397.043	8.4597	207.996	69136	0.13333
Nufip1	3	0	1	6	8.821	1	0.14199	387.005	8.38284	169.105	50872	0
E13	3	0	1	6	1.312	3	0.12424	308.433	7.54418	1236.69	807928	0
Dact2	3	0	1	6	2.354	1	0.12424	342.214	7.94753	59.6994	9624	0
Ccdc180	3	0	1	6	1.947	2	0.14199	334.231	7.86381	1154.45	379000	0
B3galnt1	3	0	1	6	1.729	2	0.12424	314.469	7.61039	2768.45	1481432	0
Slc8b1	4	0.61795	3	6	2.955	1	0.12424	334.923	7.8699	10.1708	2168	0.26667
Atl2	3	0	1	6	1.56	1	0.11044	315.569	7.63246	144.514	20552	0
Zbed5	4	0.61795	3	6	1.75	1	0.11044	293.057	7.30673	47.1148	17368	0.26667
Pear1	3	0	1	6	11.527	3	0.14199	410.145	8.55407	737.089	265864	0
Asb5	3	0	1	6	12.954	1	0.12424	397.929	8.45438	496.76	175640	0
Ptp4a1	3	0	1	6	9.268	1	0.12424	395.479	8.44829	115.615	44392	0
Sbk1	3	0	1	6	7.302	1	0.12424	350.042	7.99699	294.751	78312	0
Aoah	3	0.61557	2	6	6.234	1	0.12424	364.655	8.16899	145.798	30192	0.13333
Ano6	3	0	1	6	2.789	1	0.12424	331.436	7.8113	230.722	72696	0
Apold1	3	0.61557	2	6	8.282	1	0.14199	373.531	8.24509	84.8769	22544	0.13333
Fmnl2	6	0.92693	3	6	2.01	1	0.12424	324.573	7.74509	0	0	0.4
Mamld1	3	0.61557	2	6	2.376	1	0.12424	332.048	7.8387	171.452	54464	0.13333
Cln8	3	0	1	6	1.128	2	0.12424	310	7.54037	2727.58	2978584	0
Tcp11l2	3	0	1	6	2.487	1	0.11044	327.74	7.76488	210.894	66584	0
Akr1b7	4	0.61795	3	6	3.662	1	0.12424	330.467	7.7702	18.7317	5176	0.26667
Zfp385b	3	0.61557	2	6	1.877	1	0.14199	318.402	7.65833	151.874	29840	0.13333
Tctn3	3	0.61557	2	6	1.451	1	0.11044	310.662	7.55711	96.5422	64944	0.13333
Ptgfr	3	0.61557	2	6	10.534	1	0.12424	382.744	8.34098	29.6011	13360	0.13333
Reps1	3	0	1	6	4.063	3	0.12424	353.846	8.06853	5112.45	2534712	0
Arrdc4	3	0.61557	2	6	7.651	1	0.12424	371.02	8.23824	94.5638	23648	0.13333
Crcp	3	0.61557	2	6	3.144	1	0.12424	345.025	7.97721	101.725	18064	0.13333
Lrrcc1	3	0	1	6	3.102	1	0.11044	344.702	7.95209	294.408	34776	0
Tmem117	3	0	1	6	4.028	2	0.12424	332.511	7.81282	439.093	69752	0
Slc13a2	3	0	1	6	2.848	1	0.11044	336.671	7.8524	263.628	30488	0
Fam110c	3	0.61557	2	6	2.598	1	0.12424	334.79	7.85848	83.255	17792	0.13333
Sgms1	6	0.92693	3	6	1.135	1	0.11044	267.017	6.87979	0	0	0.4
Cpm	3	0	1	6	7.849	1	0.12424	381.495	8.33413	193.901	43432	0
Cysltr1	3	0	1	6	6.779	1	0.12424	367.996	8.19715	101.166	26408	0
Slc19a1	3	0	1	6	1.411	1	0.11044	336.946	7.86914	105.042	18616	0
Fabp12	3	0.61557	2	6	4.574	2	0.12424	377.18	8.29304	206.041	36272	0.13333
Apod	3	0	1	6	14.153	1	0.12424	383.388	8.3212	30.8027	14280	0
AK129341	3	0	1	6	2.078	1	0.12424	315.346	7.61495	428.622	136504	0
Gm6377	3	0	1	6	1.583	2	0.09939	276.244	7.02134	2703.84	8269496	0
Aoc1	3	0	1	6	1.916	2	0.11044	321.615	7.68877	2287.2	1911128	0
Slc7a15	2	0	1	4	1.439	1	0.11044	315.052	7.56244	90.895	13256	0
Yrdc	2	0	1	4	1.087	2	0.11044	279.696	7.11647	321.216	152584	0
Slc4a8	2	0	1	4	1.917	1	0.11044	318.053	7.6667	50.8253	7240	0
Trim80	2	0	1	4	1.082	1	0.11044	249.296	6.54874	76.0861	14888	0
Zfp292	2	0	1	4	1.345	2	0.12424	309.483	7.55711	337.209	140072	0
Stfa3	2	0	1	4	3.124	2	0.11044	330.563	7.79532	636.548	1194760	0
Rnf138	2	0	1	4	1.507	1	0.11044	313.894	7.61876	41.6771	7224	0
Tmtc1	2	0	1	4	2.381	1	0.12424	326.411	7.77781	133.673	33464	0
Prr3	2	0	1	4	1.094	2	0.09939	204.862	5.41783	2610	8759224	0
Tmem100	2	0	1	4	1.761	1	0.12424	311.823	7.57462	119.186	14120	0
Pik3ip1	2	0	1	4	3.219	1	0.12424	328.826	7.78999	11.4217	1496	0
Serinc3	2	0	1	4	1.317	1	0.12424	299.317	7.41252	71.8611	9592	0
Stox2	2	0	1	4	2.247	1	0.12424	319.302	7.68801	187.678	40792	0
Pabpc1l	2	0.61557	2	4	3.394	1	0.12424	369.187	8.23215	0	0	0.33333
Stfa2	2	0	1	4	1.328	1	0.09939	271.333	6.96502	2	24	0
Slc22a17	2	0	1	4	2.781	1	0.12424	346.255	8.0008	16.4624	2952	0
Mfsd10	2	0	1	4	1.063	2	0.11044	270.276	6.95741	2610	3173768	0
Maf1	2	0	1	4	3.36	2	0.12424	359.48	8.13702	1016.91	440760	0
Ttll7	2	0	1	4	4.14	1	0.12424	336.267	7.86077	94.71	49544	0
Lrrc8c	2	0	1	4	1.502	2	0.12424	302.918	7.47796	229.298	89624	0
Myom1	2	0	1	4	2.315	6	0.12424	333.082	7.86381	1690.9	4274744	0
Lfng	2	0.61557	2	4	2.889	1	0.11044	327.463	7.79075	0	0	0.33333
Zfp105	2	0	1	4	2.935	1	0.11044	338.204	7.88816	35.0829	7224	0
Leprot	2	0	1	4	4.689	1	0.12424	354.171	8.08375	119.88	47736	0
Rell1	2	0.61557	2	4	1.091	1	0.12424	298.936	7.39729	0	0	0.33333
Mpzl1	2	0	1	4	5.665	1	0.12424	349.398	8.00156	34.8703	19912	0
Ism2	2	0	1	4	5.776	1	0.12424	365.329	8.18725	63.7339	33800	0
Tox	2	0	1	4	2.556	2	0.12424	326.045	7.76488	2610	1940440	0
Igf2bp3	2	0.61557	2	4	1.105	1	0.11044	277.967	7.08907	0	0	0.33333
Hps4	2	0	1	4	1.281	1	0.11044	286.854	7.21541	191.95	40936	0
Hgsnat	2	0	1	4	1.294	1	0.11044	303.869	7.49166	44.1577	4792	0
Vsir	2	0	1	4	6.979	2	0.12424	353.162	8.05635	519.134	200584	0
Lppr1	2	0	1	4	2.052	2	0.11044	288.513	7.25422	2610	3306424	0
Spic	2	0	1	4	1.705	1	0.12424	315.114	7.62028	57.9395	11704	0
Gpr137c	2	0	1	4	1.093	2	0.11044	253.544	6.64615	2610	5049496	0
Gp49a	2	0.61557	2	4	8.83	1	0.12424	375.363	8.23139	0	0	0.33333
Tma16	2	0.61557	2	4	1.116	1	0.11044	270.06	6.93611	0	0	0.33333
Ly6f	2	0	1	4	1.91	3	0.11044	306.7	7.50536	997.687	2074344	0
Gjc3	2	0.61557	2	4	1.476	1	0.11044	313.734	7.60962	0	0	0.33333
Wfikkn1	2	0	1	4	5.649	1	0.12424	345.124	7.97873	9.16759	3192	0
Tarm1	2	0.61557	2	4	16.527	1	0.12424	438.961	8.74509	0	0	0.33333
Man1c1	2	0	1	4	1.286	1	0.11044	269.937	6.92241	137.569	25544	0
Fam214b	2	0.61557	2	4	1.091	1	0.11044	257.635	6.71388	0	0	0.33333
Lurap1l	2	0	1	4	1.28	1	0.11044	290.503	7.28999	93.2798	16536	0
Tiprl	2	0	1	4	1.292	1	0.11044	296.368	7.38436	13.0563	1816	0
Zfp609	2	0	1	4	1.342	2	0.11044	288.696	7.24737	2610	2144312	0
Eva1c	2	0	1	4	1.617	1	0.11044	315.224	7.61039	87.1593	12376	0
Hivep2	2	0	1	4	4.621	1	0.12424	344.867	7.97188	32.3709	21672	0
Hic2	2	0	1	4	2.748	2	0.12424	331.894	7.83261	2610	1742696	0
Tmem212	2	0	1	4	2.894	3	0.12424	316.329	7.63778	5216	7574232	0
Oit3	2	0	1	4	1.087	1	0.11044	285.016	7.18801	73.5771	6760	0
Slc16a6	2	0	1	4	1.55	1	0.11044	303.889	7.48025	43.8467	4600	0
Fseg	2	0	1	4	1.103	1	0.11044	273.775	7.00917	193.368	55352	0
Stambpl1	2	0.61557	2	4	12.331	1	0.12424	405.754	8.52287	0	0	0.33333
Ebf3	2	0	1	4	5.639	1	0.12424	377.586	8.30674	29.1429	7944	0
Ppp1r18	2	0	1	4	1.103	3	0.11044	243.385	6.40947	5216	13100000	0
Vwa3b	2	0	1	4	1.096	1	0.12424	296.108	7.37066	149.589	31336	0
Lmbr1l	2	0	1	4	2.358	2	0.12424	312.98	7.60278	762.01	340392	0
Dopey1	2	0	1	4	1.079	2	0.11044	262.974	6.81814	315.852	151896	0
Plcl1	2	0	1	4	3.426	1	0.12424	329.793	7.79684	19.9933	3736	0
Def6	2	0	1	4	13.247	1	0.12424	379.73	8.29075	1.12097	520	0
Zbtb10	2	0	1	4	1.48	1	0.11044	298.098	7.40567	54.4187	7176	0
Dcaf4	2	0.61557	2	4	1.098	1	0.11044	268.509	6.92088	0	0	0.33333
Slc22a29	2	0	1	4	4.144	1	0.12424	349.374	7.98786	16.9793	11896	0
Sh3bgrl3	2	0	1	4	4.242	1	0.12424	362.048	8.14692	183.493	64120	0
Mkl1	2	0	1	4	9.571	1	0.14199	387.395	8.38817	12.4747	8456	0
Zfp202	2	0	1	4	2.297	1	0.12424	337.043	7.8973	18.1762	2920	0
Zbtb2	2	0	1	4	1.09	1	0.11044	312.215	7.59212	336.631	124072	0
Dsn1	2	0	1	4	1.082	1	0.14199	290.179	7.26792	287.586	60312	0
Tspan5	2	0	1	4	7.837	1	0.12424	353.54	8.03276	13.821	6120	0
Ggnbp2	2	0	1	4	1.106	3	0.11044	292.353	7.32347	5216	6855912	0
Xrra1	2	0	1	4	1.719	1	0.11044	308.917	7.56396	46.1046	4904	0
Chic2	2	0	1	4	4.431	2	0.12424	359.579	8.13702	1683.58	822280	0
Wdr52	2	0.61557	2	4	1.082	1	0.09939	243.808	6.43686	0	0	0.33333
Smpdl3b	2	0	1	4	1.093	1	0.11044	273.608	6.99851	136.599	18984	0
Sema6b	2	0.61557	2	4	2.577	1	0.11044	327.942	7.80141	0	0	0.33333
Sema4b	2	0.61557	2	4	1.966	1	0.11044	304.629	7.48177	0	0	0.33333
Ccdc174	2	0	1	4	1.087	1	0.12424	297.657	7.4011	23.7964	3624	0
Casz1	2	0	1	4	14.097	1	0.12424	406.312	8.51754	1.22022	1288	0
Zfp777	2	0	1	4	1.087	1	0.11044	237.451	6.28085	142.407	82920	0
Casc1	2	0	1	4	1.096	1	0.12424	245.742	6.45741	393.544	208504	0
Ccdc148	2	0	1	4	1.319	2	0.11044	278.557	7.08299	442.985	191960	0
Sik3	2	0	1	4	2.673	1	0.12424	327.693	7.79075	16.2568	11800	0
Phf11c	2	0	1	4	1.551	1	0.12424	304.32	7.46959	69.1323	7672	0
Tmem55b	2	0	1	4	2.44	1	0.11044	329.387	7.77629	241.168	51272	0
Susd6	2	0	1	4	2.855	2	0.12424	328.888	7.78999	367.444	167064	0
Tspan9	2	0	1	4	1.675	1	0.11044	318.138	7.67051	58.7158	22520	0
Btbd11	2	0	1	4	3.104	1	0.11044	329.004	7.79075	143.377	54808	0
Fbxo44	2	0	1	4	6.94	1	0.12424	374.08	8.27173	32.2469	5768	0
Nbl1	2	0.61557	2	4	5.618	1	0.12424	364.712	8.18877	0	0	0.33333
Hip1	2	0	1	4	3.482	1	0.12424	354.754	8.0906	18.9489	4664	0
Bicd1	2	0	1	4	1.1	1	0.12424	278.299	7.08984	140.922	327704	0
Tceal5	2	0	1	4	1.093	3	0.11044	246.417	6.47872	5216	17000000	0
Bex1	2	0	1	4	1.1	2	0.09939	206.998	5.48709	2610	11300000	0
Sdk2	2	0	1	4	1.083	2	0.12424	300.024	7.42545	1840.1	1423672	0
BC048403	2	0.61557	2	4	3.771	1	0.11044	303.417	7.4734	0	0	0.33333
Relt	2	0	1	4	1.27	2	0.12424	290.317	7.28847	164.101	68920	0
BC022687	2	0	1	4	1.253	1	0.11044	278.633	7.10353	64.5541	16248	0
Tmprss7	2	0	1	4	1.935	2	0.12424	318.489	7.67279	1650.27	858088	0
BC016579	2	0	1	4	1.091	1	0.11044	266.04	6.88588	55.9636	11176	0
B3galt1	2	0.61557	2	4	1.083	1	0.09939	266.996	6.87598	0	0	0.33333
Osbpl10	2	0	1	4	1.091	1	0.11044	255.532	6.67964	249.968	74520	0
Dmxl2	2	0	1	4	1.574	1	0.11044	304.787	7.49699	22.1442	2664	0
Atoh8	2	0	1	4	4.553	1	0.11044	349.175	8.02059	240.882	68616	0
Ifrd1	2	0.61557	2	4	12.722	1	0.12424	385.121	8.33718	0	0	0.33333
Arl4d	2	0.61557	2	4	2.432	1	0.12424	339.976	7.91556	0	0	0.33333
Lonrf1	2	0	1	4	2.774	1	0.11044	300.428	7.42089	16.2523	2904	0
Snx24	2	0	1	4	2.091	1	0.11044	295.549	7.35087	116.264	40248	0
Slc14a1	2	0	1	4	1.351	2	0.11044	295.738	7.35544	2610	2742200	0
Mpzl3	2	0	1	4	1.581	1	0.11044	311.31	7.56396	43.9231	4696	0
Foxq1	2	0	1	4	5.665	1	0.12424	385.47	8.36838	270.877	78216	0
Tg	2	0	1	4	9.131	1	0.12424	369.396	8.20095	18.3936	10392	0
Qser1	2	0	1	4	1.069	1	0.09939	263.202	6.82652	90.8707	38680	0
Cdnf	2	0.61557	2	4	3.116	1	0.12424	344.514	7.98177	0	0	0.33333
Cdc42ep5	2	0	1	4	2.607	1	0.14199	346.864	7.99395	28.3578	6536	0
Ankdd1a	2	0	1	4	4.502	1	0.12424	334.143	7.85087	16.9844	2376	0
Gpm6b	2	0	1	4	1.074	3	0.12424	317.183	7.65605	1531.46	1229272	0
Htra3	2	0	1	4	1.503	1	0.12424	319.762	7.67964	48.5552	9320	0
Adgb	2	0	1	4	6.48	1	0.12424	336.776	7.87218	0.27407	40	0
Adarb1	2	0	1	4	1.737	1	0.12424	316.905	7.6492	53.6194	8456	0
Tspan15	2	0	1	4	2.791	1	0.11044	342.037	7.93002	12.6152	3720	0
Acpp	2	0.61557	2	4	1.595	1	0.12424	329.999	7.82424	0	0	0.33333
Usp53	2	0	1	4	1.769	2	0.12424	316.94	7.6629	722.552	290888	0
Abtb2	2	0	1	4	1.742	1	0.11044	304.956	7.48862	105.871	28568	0
Abhd15	2	0	1	4	1.535	2	0.11044	303.178	7.45285	2610	3149304	0
Mylip	2	0	1	4	5.137	2	0.12424	347.071	8.00232	854.567	397384	0
Slc25a47	2	0	1	4	2.162	1	0.11044	316.681	7.62028	53.0063	8520	0
Slc25a29	2	0	1	4	1.988	1	0.11044	306.69	7.50612	1011.75	564184	0
AI607873	2	0	1	4	10.569	1	0.12424	366.206	8.15757	1.94329	360	0
Spata24	2	0	1	4	1.077	2	0.09939	238.377	6.33184	2610	4570616	0
Cela2a	2	0.61557	2	4	8.37	1	0.12424	365.112	8.1629	0	0	0.33333
1700067K01Rik	2	0.61557	2	4	2.468	1	0.11044	303.996	7.45361	0	0	0.33333
Zyg11a	1	0	1	2	1.027	1	0.09939	236.605	6.28846	0	0	0
Tex35	1	0	1	2	1.038	1	0.11044	259.158	6.77172	0	0	0
mCG_134547	1	0	1	2	1.055	1	0.11044	287.996	7.26944	0	0	0
Suco	1	0	1	2	1.094	1	0.12424	286.935	7.24128	0	0	0
Tmc7	1	0	1	2	1.044	1	0.11044	294.564	7.36305	0	0	0
Slc43a3	1	0	1	2	1.262	1	0.11044	278.515	7.09516	0	0	0
Slc35e4	1	0	1	2	2.479	1	0.11044	300.154	7.42241	0	0	0
Slc28a2	1	0	1	2	1.047	1	0.09939	239.767	6.36228	0	0	0
Sncaip	1	0	1	2	1.063	1	0.11044	260.004	6.77248	0	0	0
Rnf144a	1	0	1	2	2.319	1	0.12424	327.769	7.78847	0	0	0
Rnf138rt1	1	0	1	2	1.265	1	0.11044	276.484	7.07233	0	0	0
Vwa1	1	0	1	2	2.232	1	0.12424	336.493	7.89577	0	0	0
Syde2	1	0	1	2	2.499	1	0.11044	297.038	7.3737	0	0	0
Rab30	1	0	1	2	1.047	1	0.11044	270.109	6.95133	0	0	0
Rab11fip5	1	0	1	2	2.295	1	0.11044	309.716	7.54722	0	0	0
Ptpn9	1	0	1	2	1.041	1	0.11044	246.157	6.50536	0	0	0
Zkscan4	1	0	1	2	1.286	1	0.11044	277.467	7.08831	0	0	0
Prr7	1	0	1	2	1.038	1	0.09036	176.527	4.42468	0	0	0
Plekhm2	1	0	1	2	1.042	1	0.12424	262.586	6.81891	0	0	0
Osbpl7	1	0	1	2	8.302	1	0.14199	376.795	8.28238	0	0	0
Nudt18	1	0	1	2	1.029	1	0.09939	245.456	6.4772	0	0	0
Stfa2l1	1	0	1	2	1.29	1	0.09939	270.666	6.9635	0	0	0
Sema4c	1	0	1	2	1.052	1	0.12424	249.368	6.567	0	0	0
Zxdc	1	0	1	2	1.624	1	0.11044	292.12	7.33108	0	0	0
Myrip	1	0	1	2	1.874	1	0.12424	300.681	7.4323	0	0	0
Zfp472	1	0	1	2	7.122	1	0.12424	399.927	8.497	0	0	0
Ms4a8a	1	0	1	2	2.154	1	0.11044	309.466	7.55483	0	0	0
Slfn1	1	0	1	2	4.957	1	0.12424	326.912	7.74205	0	0	0
Svopl	1	0	1	2	1.032	1	0.09939	222.951	5.96426	0	0	0
Zfp13	1	0	1	2	4.582	1	0.12424	346.1	7.98025	0	0	0
Mid1	1	0	1	2	4.686	1	0.12424	346.1	7.98025	0	0	0
Spring1	1	0	1	2	1.432	1	0.12424	308.894	7.5594	0	0	0
Prdm11	1	0	1	2	1.536	1	0.12424	291.337	7.30521	0	0	0
Zfp36l2	1	0	1	2	1.298	1	0.12424	321.236	7.72378	0	0	0
Slc10a6	1	0	1	2	1.479	1	0.12424	320.536	7.7078	0	0	0
Mab21l4	1	0	1	2	1.256	1	0.11044	272.982	6.99851	0	0	0
Lrtm1	1	0	1	2	3.799	1	0.12424	334.017	7.86686	0	0	0
Myom3	1	0	1	2	1.039	1	0.11044	245.501	6.47568	0	0	0
Lancl3	1	0	1	2	1.056	1	0.11044	272.577	7.00993	0	0	0
Kcnj16	1	0	1	2	1.446	1	0.11044	269.26	6.94904	0	0	0
Kctd15	1	0	1	2	1.532	1	0.11044	282.419	7.17127	0	0	0
Pappa2	1	0	1	2	1.643	1	0.12424	316.71	7.67431	0	0	0
Igdcc4	1	0	1	2	1.48	1	0.12424	289.805	7.28618	0	0	0
Rnf125	1	0	1	2	7.646	1	0.12424	369.821	8.21237	0	0	0
Rbm22	1	0	1	2	1.231	1	0.11044	262.071	6.82119	0	0	0
Hnrnpdl	1	0	1	2	1.224	1	0.12424	319.729	7.70019	0	0	0
Oser1	1	0	1	2	1.041	1	0.11044	262.717	6.83945	0	0	0
Greb1l	1	0	1	2	1.044	1	0.09939	235.104	6.26106	0	0	0
Tnfrsf26	1	0	1	2	1.05	1	0.09939	211.506	5.65299	0	0	0
Gpr137b	1	0	1	2	1.259	1	0.09939	266.452	6.88892	0	0	0
Zhx3	1	0	1	2	2.729	1	0.11044	330.638	7.82576	0	0	0
Retnlg	1	0	1	2	1.038	1	0.00152	1	0.00456	0	0	0
Gm5483	1	0	1	2	1.038	1	0.00152	1	0.00456	0	0	0
Rgag4	1	0	1	2	1.048	1	0.11044	242.439	6.40947	0	0	0
Treh	1	0	1	2	1.61	1	0.12424	305.417	7.51297	0	0	0
Foxj2	1	0	1	2	1.233	1	0.11044	269.987	6.94372	0	0	0
Slc13a5	1	0	1	2	1.285	1	0.11044	271.602	6.99242	0	0	0
Sec14l4	1	0	1	2	1.507	1	0.11044	271.602	6.99242	0	0	0
Fcrl1	1	0	1	2	7.088	1	0.12424	375.763	8.25346	0	0	0
Fam20a	1	0	1	2	1.713	1	0.11044	295.399	7.35544	0	0	0
Tmem88b	1	0	1	2	1.04	1	0.09939	231.953	6.16517	0	0	0
Fam107a	1	0	1	2	1.045	1	0.09939	235.102	6.25421	0	0	0
Fam102b	1	0	1	2	1.492	1	0.11044	289.7	7.25955	0	0	0
Pnrc1	1	0	1	2	1.05	1	0.09939	254.453	6.67735	0	0	0
Esm1	1	0	1	2	5.579	1	0.12424	365.888	8.19639	0	0	0
Enpp6	1	0	1	2	1.303	1	0.09939	272.946	6.95285	0	0	0
Nab2	1	0	1	2	5.732	1	0.12424	366.479	8.19867	0	0	0
Sema3f	1	0	1	2	3.755	1	0.11044	332.969	7.84707	0	0	0
Dsc2	1	0	1	2	4.712	1	0.12424	363.012	8.17127	0	0	0
Rims3	1	0	1	2	1.05	1	0.11044	252.201	6.62788	0	0	0
Defb1	1	0	1	2	3.247	1	0.11044	326.644	7.76716	0	0	0
Ypel4	1	0	1	2	1.043	1	0.00152	1	0.00456	0	0	0
Dedd2	1	0	1	2	1.043	1	0.00152	1	0.00456	0	0	0
Ttll8	1	0	1	2	1.057	1	0.11044	279.921	7.12256	0	0	0
Fam53b	1	0	1	2	1.047	1	0.11044	279.921	7.12256	0	0	0
Vopp1	1	0	1	2	1.027	1	0.00152	1	0.00456	0	0	0
Cyyr1	1	0	1	2	1.027	1	0.00152	1	0.00456	0	0	0
Zscan25	1	0	1	2	1.577	1	0.11044	305.946	7.48101	0	0	0
Cyb561d1	1	0	1	2	1.266	1	0.12424	294.34	7.36229	0	0	0
Ctla2b	1	0	1	2	1.036	1	0.00152	1	0.00456	0	0	0
Ctla2a	1	0	1	2	1.036	1	0.00152	1	0.00456	0	0	0
Crispld2	1	0	1	2	2.972	1	0.12424	325.379	7.76335	0	0	0
Gfpt2	1	0	1	2	1.951	1	0.11044	329.219	7.7839	0	0	0
Cnst	1	0	1	2	1.051	1	0.09939	251.569	6.61723	0	0	0
Cmtr2	1	0	1	2	1.306	1	0.11044	280.817	7.13702	0	0	0
Cln6	1	0	1	2	1.039	1	0.11044	248.606	6.54721	0	0	0
Marveld3	1	0	1	2	1.223	1	0.11044	278.388	7.09516	0	0	0
Efcab4a	1	0	1	2	1.523	1	0.11044	293.384	7.32956	0	0	0
Cep85l	1	0	1	2	1.252	1	0.11044	287.497	7.24965	0	0	0
Zfp459	1	0	1	2	1.071	1	0.11044	282.179	7.16061	0	0	0
Hilpda	1	0	1	2	6.464	1	0.12424	355.987	8.08832	0	0	0
Tmem252	1	0	1	2	1.283	1	0.11044	289.649	7.28314	0	0	0
Scrg1	1	0	1	2	2.056	1	0.11044	295.064	7.36076	0	0	0
Milr1	1	0	1	2	1.261	1	0.11044	253.246	6.64691	0	0	0
Gpcpd1	1	0	1	2	6.295	1	0.12424	363.162	8.18116	0	0	0
Bex4	1	0	1	2	1.045	1	0.09036	178.123	4.49393	0	0	0
BC100530	1	0	1	2	1.04	1	0.09939	263.314	6.83032	0	0	0
Ppp1r36	1	0	1	2	2.851	1	0.11044	331.356	7.82119	0	0	0
Bzw2	1	0	1	2	1.049	1	0.11044	279.859	7.12408	0	0	0
Fbxo34	1	0	1	2	1.26	1	0.12424	273.738	7.0221	0	0	0
Arhgap31	1	0	1	2	1.291	1	0.11044	276.085	7.07538	0	0	0
Aph1c	1	0	1	2	2.73	1	0.11044	326.163	7.78086	0	0	0
D230025D16Rik	1	0	1	2	1.038	1	0.11044	264.748	6.86381	0	0	0
Amy1	1	0	1	2	3.081	1	0.11044	329.219	7.7839	0	0	0
Cend1	1	0	1	2	1.072	1	0.11044	281.699	7.14235	0	0	0
Afap1l1	1	0	1	2	2.53	1	0.12424	324.201	7.75498	0	0	0
Slc4a9	1	0	1	2	3.735	1	0.11044	325.181	7.739	0	0	0
Ablim3	1	0	1	2	1.033	1	0.11044	282.05	7.14996	0	0	0
Klhl29	1	0	1	2	1.038	1	0.09939	244.435	6.4597	0	0	0
Ttpa	1	0	1	2	3.884	1	0.12424	345.855	7.99547	0	0	0
Tmem71	1	0	1	2	1.435	1	0.11044	305.316	7.49547	0	0	0
AI118078	1	0	1	2	1.035	1	0.09036	200.969	5.33869	0	0	0
AA467197	1	0	1	2	1.25	1	0.09036	226.493	6.02819	0	0	0
1810055G02Rik	1	0	1	2	1.274	1	0.11044	284.215	7.19562	0	0	0
1700017B05Rik	1	0	1	2	2.752	1	0.12424	329.86	7.82119	0	0	0
